# Supplementary material for: Uncovering the genomic basis of phenological traits in Chouardia litardierei (Asparagaceae) through a genome-wide association study (GWAS)
Source: Front Plant Sci. 2025 Apr 17;16:1571608. doi: 10.3389/fpls.2025.1571608 (PMC12070586; doi:10.3389/fpls.2025.1571608)
Supplement: Supplementary file 11 [file Table11.xlsx]

## Sheet: Sheet1
Table 1. EggNOG output file for 7 SNP loci that exceeded the genome-wide significance threshold (1 × 10−3) in the multivariate GWAS analysis of the Chouardia litardierei traits: FPD, VPD, BOF, and BOS.
query	seed_ortholog	evalue	score	eggNOG_OGs	max_annot_lvl	COG_category	Description	Preferred_name	GOs	EC	KEGG_ko	KEGG_Pathway	KEGG_Module	KEGG_Reaction	KEGG_rclass	BRITE	KEGG_TC	CAZy	BiGG_Reaction	PFAMs
HiC_scaffold_13:97197552-97247552_2	3656.XP_008449842.1	4.25e-59	186.0	COG0080@1|root,KOG3257@2759|Eukaryota,37N46@33090|Viridiplantae,3GHZ3@35493|Streptophyta,4JMRB@91835|fabids	35493|Streptophyta	J	Belongs to the universal ribosomal protein uL11 family	-	GO:0000027,GO:0000313,GO:0000315,GO:0003674,GO:0003676,GO:0003723,GO:0003735,GO:0005198,GO:0005488,GO:0005575,GO:0005622,GO:0005623,GO:0005737,GO:0005739,GO:0005759,GO:0005761,GO:0005762,GO:0005840,GO:0006412,GO:0006518,GO:0006807,GO:0006996,GO:0008150,GO:0008152,GO:0009058,GO:0009059,GO:0009987,GO:0010467,GO:0015934,GO:0016043,GO:0019538,GO:0019843,GO:0022607,GO:0022613,GO:0022618,GO:0031974,GO:…	-	ko:K02867	ko03010,map03010	M00178,M00179	-	-	br01610,ko00000,ko00001,ko00002,ko03011	-	-	-	Ribosomal_L11,Ribosomal_L11_N
HiC_scaffold_13:97197552-97247552_19	4533.OB02G22170.1	1.86e-11	67.8	2CV4N@1|root,2RRA3@2759|Eukaryota,381X6@33090|Viridiplantae,3GQRZ@35493|Streptophyta,3KXQ3@4447|Liliopsida,3IEIB@38820|Poales	35493|Streptophyta	-	-	-	-	-	-	-	-	-	-	-	-	-	-	Transposase_28
HiC_scaffold_13:97197552-97247552_32	3656.XP_008458108.1	1.25e-52	185.0	COG2801@1|root,KOG0017@2759|Eukaryota,37SNQ@33090|Viridiplantae,3GHRQ@35493|Streptophyta,4JTCD@91835|fabids	35493|Streptophyta	L	transposition, RNA-mediated	-	-	-	-	-	-	-	-	-	-	-	-	RVT_2,Retrotran_gag_2,gag_pre-integrs,rve,zf-CCHC
HiC_scaffold_13:97197552-97247552_34	4098.XP_009631689.1	4.75e-10	65.1	COG2801@1|root,KOG0017@2759|Eukaryota,37ZYN@33090|Viridiplantae,3GPTS@35493|Streptophyta	35493|Streptophyta	L	Reverse transcriptase (RNA-dependent DNA polymerase)	-	-	-	-	-	-	-	-	-	-	-	-	RVT_2
HiC_scaffold_13:97197552-97247552_35	3641.EOY32645	1.05e-17	81.3	COG2801@1|root,KOG0017@2759|Eukaryota,37SNQ@33090|Viridiplantae,3GHRQ@35493|Streptophyta	35493|Streptophyta	L	spliceosomal complex assembly	-	-	-	-	-	-	-	-	-	-	-	-	RVT_2,gag_pre-integrs,rve,zf-CCHC
HiC_scaffold_13:97197552-97247552_36	3827.XP_004513179.1	8.22e-45	161.0	COG2801@1|root,KOG0017@2759|Eukaryota,37SNQ@33090|Viridiplantae,3GHRQ@35493|Streptophyta	35493|Streptophyta	L	spliceosomal complex assembly	-	-	-	-	-	-	-	-	-	-	-	-	RVT_2,Retrotran_gag_2,gag_pre-integrs,rve,zf-CCHC
HiC_scaffold_13:97197552-97247552_50	3649.evm.model.supercontig_1466.2	3.35e-36	129.0	COG5594@1|root,KOG1134@2759|Eukaryota,37HX2@33090|Viridiplantae,3GCVA@35493|Streptophyta,3HQ2S@3699|Brassicales	35493|Streptophyta	S	ion transport	-	-	-	ko:K21989	-	-	-	-	ko00000,ko02000	-	-	-	PHM7_cyt,RSN1_7TM,RSN1_TM
HiC_scaffold_14:108972955-109022955_3	38727.Pavir.J35687.1.p	1.54e-12	64.3	COG0617@1|root,KOG2159@2759|Eukaryota	2759|Eukaryota	J	CTP:tRNA cytidylyltransferase activity	-	GO:0001680,GO:0003674,GO:0003824,GO:0004652,GO:0004810,GO:0005575,GO:0005622,GO:0005623,GO:0005634,GO:0005737,GO:0005739,GO:0005759,GO:0006139,GO:0006396,GO:0006399,GO:0006725,GO:0006807,GO:0008033,GO:0008150,GO:0008152,GO:0009987,GO:0010467,GO:0016070,GO:0016740,GO:0016772,GO:0016779,GO:0031123,GO:0031974,GO:0034470,GO:0034641,GO:0034660,GO:0042780,GO:0043170,GO:0043226,GO:0043227,GO:0043229,GO:…	-	-	-	-	-	-	-	-	-	-	PolyA_pol,PolyA_pol_RNAbd
HiC_scaffold_14:108972955-109022955_18	218851.Aquca_012_00052.1	0.0	1328.0	COG0507@1|root,KOG0987@2759|Eukaryota,37I5H@33090|Viridiplantae,3GC0A@35493|Streptophyta	35493|Streptophyta	D	Belongs to the helicase family	-	-	-	-	-	-	-	-	-	-	-	-	Helitron_like_N,Herpes_Helicase,PIF1
HiC_scaffold_14:108972955-109022955_19	218851.Aquca_016_00041.1	2.14e-100	307.0	COG0507@1|root,KOG0987@2759|Eukaryota	2759|Eukaryota	L	G-quadruplex DNA unwinding	-	-	3.6.4.12	ko:K15255	-	-	-	-	ko00000,ko01000,ko03029,ko03032	-	-	-	Helitron_like_N,Herpes_Helicase,PIF1
HiC_scaffold_14:108972955-109022955_31	4432.XP_010246623.1	6.03e-09	61.2	2EPRT@1|root,2SSWU@2759|Eukaryota	2759|Eukaryota	-	-	-	-	-	-	-	-	-	-	-	-	-	-	Retrotrans_gag
HiC_scaffold_14:108972955-109022955_35	161934.XP_010678922.1	0.0	1343.0	COG2801@1|root,KOG0017@2759|Eukaryota,37RKH@33090|Viridiplantae,3GGZK@35493|Streptophyta	35493|Streptophyta	L	strictosidine synthase activity	-	-	-	-	-	-	-	-	-	-	-	-	RVT_1,Retrotrans_gag,rve
HiC_scaffold_15:239041297-239091297_1	3659.XP_004148556.1	6.62e-12	67.0	COG2801@1|root,KOG0017@2759|Eukaryota,37V4J@33090|Viridiplantae,3GIPU@35493|Streptophyta,4JU63@91835|fabids	35493|Streptophyta	L	gag-polypeptide of LTR copia-type	-	-	-	-	-	-	-	-	-	-	-	-	Retrotran_gag_2,gag_pre-integrs,zf-CCHC
HiC_scaffold_15:239041297-239091297_9	3988.XP_002532644.1	1.65e-21	95.1	28W8B@1|root,2R30B@2759|Eukaryota,37X7C@33090|Viridiplantae,3GJR2@35493|Streptophyta,4JU9T@91835|fabids	35493|Streptophyta	-	-	-	-	-	-	-	-	-	-	-	-	-	-	RVP_2,Retrotrans_gag
HiC_scaffold_15:239041297-239091297_56	3659.XP_004148556.1	1.49e-21	96.3	COG2801@1|root,KOG0017@2759|Eukaryota,37V4J@33090|Viridiplantae,3GIPU@35493|Streptophyta,4JU63@91835|fabids	35493|Streptophyta	L	gag-polypeptide of LTR copia-type	-	-	-	-	-	-	-	-	-	-	-	-	Retrotran_gag_2,gag_pre-integrs,zf-CCHC
HiC_scaffold_2:95510920-95560920_1	57918.XP_004301972.1	2.64e-25	107.0	COG2801@1|root,KOG0017@2759|Eukaryota,37R6P@33090|Viridiplantae,3G8BW@35493|Streptophyta,4JN0G@91835|fabids	35493|Streptophyta	L	Uncharacterized protein K02A2.6-like	-	GO:0000943,GO:0003674,GO:0003676,GO:0003723,GO:0003824,GO:0003887,GO:0003964,GO:0004518,GO:0004540,GO:0005488,GO:0005575,GO:0005622,GO:0005623,GO:0005634,GO:0006139,GO:0006259,GO:0006278,GO:0006508,GO:0006725,GO:0006807,GO:0008150,GO:0008152,GO:0008233,GO:0009058,GO:0009059,GO:0009987,GO:0016070,GO:0016740,GO:0016772,GO:0016779,GO:0016787,GO:0016788,GO:0018130,GO:0019438,GO:0019538,GO:0032196,GO:…	-	-	-	-	-	-	-	-	-	-	RVT_1,RVT_3,rve
HiC_scaffold_2:95510920-95560920_2	2711.XP_006486503.1	1.77e-233	710.0	COG2801@1|root,KOG0017@2759|Eukaryota,37R6P@33090|Viridiplantae,3G8BW@35493|Streptophyta	35493|Streptophyta	E	Uncharacterized protein K02A2.6-like	-	-	-	-	-	-	-	-	-	-	-	-	RVT_1,RVT_3,Retrotrans_gag,rve
HiC_scaffold_2:95510920-95560920_10	50452.A0A087HNL4	3.04e-33	127.0	COG2801@1|root,KOG0017@2759|Eukaryota,37NRU@33090|Viridiplantae	33090|Viridiplantae	Q	microtubule motor activity	-	-	-	-	-	-	-	-	-	-	-	-	Chromo,RVP_2,RVT_1,Retrotrans_gag,rve
HiC_scaffold_2:95510920-95560920_11	42345.XP_008777132.1	7.11e-49	175.0	COG2801@1|root,KOG0017@2759|Eukaryota,37NRU@33090|Viridiplantae,3GGV0@35493|Streptophyta,3M4R8@4447|Liliopsida	35493|Streptophyta	L	transposition, RNA-mediated	-	-	-	-	-	-	-	-	-	-	-	-	RVP_2,RVT_1,Retrotrans_gag,rve
HiC_scaffold_2:95510920-95560920_13	90675.XP_010418661.1	9.46e-75	246.0	COG2801@1|root,KOG0017@2759|Eukaryota,37NRU@33090|Viridiplantae,3GGV0@35493|Streptophyta,3HXPF@3699|Brassicales	35493|Streptophyta	I	3-hydroxyisobutyryl-CoA hydrolase activity	-	GO:0000943,GO:0003674,GO:0003676,GO:0003723,GO:0003824,GO:0003887,GO:0003964,GO:0004518,GO:0004540,GO:0005488,GO:0005575,GO:0005622,GO:0005623,GO:0005634,GO:0006139,GO:0006259,GO:0006278,GO:0006508,GO:0006725,GO:0006807,GO:0008150,GO:0008152,GO:0008233,GO:0009058,GO:0009059,GO:0009987,GO:0016070,GO:0016740,GO:0016772,GO:0016779,GO:0016787,GO:0016788,GO:0018130,GO:0019438,GO:0019538,GO:0032196,GO:…	-	-	-	-	-	-	-	-	-	-	Chromo,RVP_2,RVT_1,Retrotrans_gag,rve
HiC_scaffold_2:95510920-95560920_14	50452.A0A087GTL8	1.38e-11	63.2	COG2801@1|root,KOG0017@2759|Eukaryota,37NRU@33090|Viridiplantae,3GGV0@35493|Streptophyta,3HXPF@3699|Brassicales	35493|Streptophyta	I	3-hydroxyisobutyryl-CoA hydrolase activity	-	GO:0000943,GO:0003674,GO:0003676,GO:0003723,GO:0003824,GO:0003887,GO:0003964,GO:0004518,GO:0004540,GO:0005488,GO:0005575,GO:0005622,GO:0005623,GO:0005634,GO:0006139,GO:0006259,GO:0006278,GO:0006508,GO:0006725,GO:0006807,GO:0008150,GO:0008152,GO:0008233,GO:0009058,GO:0009059,GO:0009987,GO:0016070,GO:0016740,GO:0016772,GO:0016779,GO:0016787,GO:0016788,GO:0018130,GO:0019438,GO:0019538,GO:0032196,GO:…	-	-	-	-	-	-	-	-	-	-	Chromo,RVP_2,RVT_1,Retrotrans_gag,rve
HiC_scaffold_2:95510920-95560920_32	2711.XP_006493522.1	1.01e-25	107.0	28W8B@1|root,2R30B@2759|Eukaryota,37X7C@33090|Viridiplantae,3GJR2@35493|Streptophyta	35493|Streptophyta	-	-	-	-	-	-	-	-	-	-	-	-	-	-	RVP_2,Retrotrans_gag
HiC_scaffold_2:95510920-95560920_33	28532.XP_010541181.1	3.82e-132	427.0	COG2801@1|root,KOG0017@2759|Eukaryota,37NRU@33090|Viridiplantae,3GGV0@35493|Streptophyta,3HXPF@3699|Brassicales	35493|Streptophyta	I	3-hydroxyisobutyryl-CoA hydrolase activity	-	GO:0000943,GO:0003674,GO:0003676,GO:0003723,GO:0003824,GO:0003887,GO:0003964,GO:0004518,GO:0004540,GO:0005488,GO:0005575,GO:0005622,GO:0005623,GO:0005634,GO:0006139,GO:0006259,GO:0006278,GO:0006508,GO:0006725,GO:0006807,GO:0008150,GO:0008152,GO:0008233,GO:0009058,GO:0009059,GO:0009987,GO:0016070,GO:0016740,GO:0016772,GO:0016779,GO:0016787,GO:0016788,GO:0018130,GO:0019438,GO:0019538,GO:0032196,GO:…	-	-	-	-	-	-	-	-	-	-	Chromo,RVP_2,RVT_1,Retrotrans_gag,rve
HiC_scaffold_2:95510920-95560920_34	3712.Bo4g174850.1	2.7e-40	146.0	COG2801@1|root,KOG0017@2759|Eukaryota,37NRU@33090|Viridiplantae,3GGV0@35493|Streptophyta	35493|Streptophyta	E	L-threonine ammonia-lyase activity	-	-	-	-	-	-	-	-	-	-	-	-	RVP_2,RVT_1,Retrotrans_gag,gag-asp_proteas,rve
HiC_scaffold_2:95510920-95560920_35	50452.A0A087H2U0	2.49e-98	322.0	COG2801@1|root,KOG0017@2759|Eukaryota,37NRU@33090|Viridiplantae,3GGV0@35493|Streptophyta,3HXPF@3699|Brassicales	35493|Streptophyta	I	3-hydroxyisobutyryl-CoA hydrolase activity	-	GO:0000943,GO:0003674,GO:0003676,GO:0003723,GO:0003824,GO:0003887,GO:0003964,GO:0004518,GO:0004540,GO:0005488,GO:0005575,GO:0005622,GO:0005623,GO:0005634,GO:0006139,GO:0006259,GO:0006278,GO:0006508,GO:0006725,GO:0006807,GO:0008150,GO:0008152,GO:0008233,GO:0009058,GO:0009059,GO:0009987,GO:0016070,GO:0016740,GO:0016772,GO:0016779,GO:0016787,GO:0016788,GO:0018130,GO:0019438,GO:0019538,GO:0032196,GO:…	-	-	-	-	-	-	-	-	-	-	Chromo,RVP_2,RVT_1,Retrotrans_gag,rve
HiC_scaffold_2:95510920-95560920_36	4565.Traes_1BS_7A07887F9.2	1.69e-28	110.0	COG2801@1|root,KOG0017@2759|Eukaryota,37NRU@33090|Viridiplantae,3GGV0@35493|Streptophyta,3M4R8@4447|Liliopsida	35493|Streptophyta	L	transposition, RNA-mediated	-	-	-	-	-	-	-	-	-	-	-	-	RVP_2,RVT_1,Retrotrans_gag,rve
HiC_scaffold_2:95510920-95560920_37	161934.XP_010680039.1	5.52e-19	85.5	COG2801@1|root,KOG0017@2759|Eukaryota,380ER@33090|Viridiplantae,3GQ2S@35493|Streptophyta	35493|Streptophyta	L	Chromatin organization modifier domain	-	-	-	-	-	-	-	-	-	-	-	-	Chromo
HiC_scaffold_2:95510920-95560920_46	981085.XP_010098040.1	2.57e-11	67.0	28W8B@1|root,2R30B@2759|Eukaryota,37X7C@33090|Viridiplantae,3GJR2@35493|Streptophyta,4JU9T@91835|fabids	35493|Streptophyta	-	-	-	-	-	-	-	-	-	-	-	-	-	-	RVP_2,Retrotrans_gag
HiC_scaffold_2:95510920-95560920_47	3656.XP_008453052.1	4.34e-36	131.0	COG2801@1|root,KOG0017@2759|Eukaryota,380EX@33090|Viridiplantae,3GQ9P@35493|Streptophyta	35493|Streptophyta	L	Integrase core domain	-	-	-	-	-	-	-	-	-	-	-	-	rve
HiC_scaffold_2:95510920-95560920_48	28532.XP_010544454.1	2.28e-16	78.6	COG2801@1|root,KOG0017@2759|Eukaryota,37NRU@33090|Viridiplantae,3GGV0@35493|Streptophyta,3HXPF@3699|Brassicales	35493|Streptophyta	I	3-hydroxyisobutyryl-CoA hydrolase activity	-	-	-	-	-	-	-	-	-	-	-	-	Chromo,RVP_2,RVT_1,Retrotrans_gag,rve
HiC_scaffold_2:95510920-95560920_49	4432.XP_010247105.1	5.85e-34	129.0	COG2801@1|root,KOG0017@2759|Eukaryota,37NRU@33090|Viridiplantae	33090|Viridiplantae	Q	microtubule motor activity	-	GO:0000943,GO:0003674,GO:0003676,GO:0003723,GO:0003824,GO:0003887,GO:0003964,GO:0004518,GO:0004540,GO:0005488,GO:0005575,GO:0005622,GO:0005623,GO:0005634,GO:0006139,GO:0006259,GO:0006278,GO:0006508,GO:0006725,GO:0006807,GO:0008150,GO:0008152,GO:0008233,GO:0009058,GO:0009059,GO:0009987,GO:0016070,GO:0016740,GO:0016772,GO:0016779,GO:0016787,GO:0016788,GO:0018130,GO:0019438,GO:0019538,GO:0032196,GO:…	-	-	-	-	-	-	-	-	-	-	Chromo,RVP_2,RVT_1,Retrotrans_gag,gag-asp_proteas,rve
HiC_scaffold_2:95510920-95560920_52	42345.XP_008777861.1	1.01e-124	368.0	28P94@1|root,2QVW7@2759|Eukaryota,37M8I@33090|Viridiplantae,3GCZV@35493|Streptophyta,3KY5D@4447|Liliopsida	35493|Streptophyta	S	Protein of unknown function (DUF1644)	-	-	-	-	-	-	-	-	-	-	-	-	DUF1644
HiC_scaffold_4:14601431-14651431_5	3750.XP_008390079.1	1.14e-23	100.0	COG2801@1|root,KOG4197@1|root,KOG0017@2759|Eukaryota,KOG4197@2759|Eukaryota,388J0@33090|Viridiplantae,3GXC7@35493|Streptophyta,4JF8V@91835|fabids	35493|Streptophyta	L	Pentatricopeptide repeat-containing protein	-	-	-	-	-	-	-	-	-	-	-	-	Glyco_hydro_28,PPR,PPR_2
HiC_scaffold_4:14601431-14651431_6	4538.ORGLA03G0406500.1	2.21e-68	220.0	COG2801@1|root,KOG0017@2759|Eukaryota,37YYP@33090|Viridiplantae,3GQD7@35493|Streptophyta,3M3FD@4447|Liliopsida,3IKKZ@38820|Poales	35493|Streptophyta	L	Reverse transcriptase (RNA-dependent DNA polymerase)	-	-	-	-	-	-	-	-	-	-	-	-	RVT_2
HiC_scaffold_4:14601431-14651431_7	4113.PGSC0003DMT400095085	3.57e-25	102.0	COG2801@1|root,KOG0017@2759|Eukaryota,37YIU@33090|Viridiplantae,3GNSS@35493|Streptophyta,44TRJ@71274|asterids	35493|Streptophyta	L	Integrase core domain	-	-	-	-	-	-	-	-	-	-	-	-	Retrotran_gag_2,rve
HiC_scaffold_4:14601431-14651431_8	3750.XP_008365345.1	1.45e-70	227.0	COG2801@1|root,COG5059@1|root,KOG0017@2759|Eukaryota,KOG4280@2759|Eukaryota,37RUZ@33090|Viridiplantae,3G9S6@35493|Streptophyta,4JHII@91835|fabids	35493|Streptophyta	Z	Belongs to the TRAFAC class myosin-kinesin ATPase superfamily. Kinesin family	KIN12B	GO:0000003,GO:0000226,GO:0000280,GO:0000910,GO:0003674,GO:0003774,GO:0003777,GO:0003824,GO:0005575,GO:0005622,GO:0005623,GO:0005737,GO:0005856,GO:0005871,GO:0005875,GO:0006928,GO:0006996,GO:0007010,GO:0007017,GO:0007018,GO:0007049,GO:0007112,GO:0007140,GO:0007275,GO:0007276,GO:0008150,GO:0008574,GO:0009524,GO:0009555,GO:0009987,GO:0015630,GO:0016043,GO:0016462,GO:0016787,GO:0016817,GO:0016818,GO:…	-	ko:K10400	-	-	-	-	ko00000,ko04812	-	-	-	Kinesin
HiC_scaffold_4:14601431-14651431_9	3760.EMJ04758	1.2e-43	151.0	2AXHF@1|root,2S012@2759|Eukaryota,37VRW@33090|Viridiplantae,3GPK5@35493|Streptophyta,4JU19@91835|fabids	35493|Streptophyta	S	Pfam:UBN2_2	-	-	-	-	-	-	-	-	-	-	-	-	Retrotran_gag_2,zf-CCHC
HiC_scaffold_4:14601431-14651431_10	3656.XP_008461736.1	9.41e-24	97.4	2AXHF@1|root,2S012@2759|Eukaryota,37VRW@33090|Viridiplantae,3GPK5@35493|Streptophyta,4JU19@91835|fabids	35493|Streptophyta	S	Pfam:UBN2_2	-	-	-	-	-	-	-	-	-	-	-	-	Retrotran_gag_2,zf-CCHC
HiC_scaffold_4:14601431-14651431_18	13333.ERM98543	1.3e-149	434.0	COG2801@1|root,KOG0017@2759|Eukaryota,383NN@33090|Viridiplantae,3GNHS@35493|Streptophyta	35493|Streptophyta	L	transposition, RNA-mediated	-	-	-	-	-	-	-	-	-	-	-	-	-
HiC_scaffold_4:14601431-14651431_19	57918.XP_004309292.1	1.09e-104	323.0	COG2801@1|root,KOG0017@2759|Eukaryota,37U72@33090|Viridiplantae,3GI5J@35493|Streptophyta	35493|Streptophyta	M	aspartic-type endopeptidase activity	-	-	-	-	-	-	-	-	-	-	-	-	RVT_2,rve
HiC_scaffold_4:14601431-14651431_20	57918.XP_004301938.1	2.94e-101	317.0	COG2801@1|root,KOG0017@2759|Eukaryota,37U72@33090|Viridiplantae,3GI5J@35493|Streptophyta	35493|Streptophyta	M	aspartic-type endopeptidase activity	-	-	-	-	-	-	-	-	-	-	-	-	RVT_2,rve
HiC_scaffold_4:14601431-14651431_21	161934.XP_010667383.1	2.19e-80	254.0	28PZB@1|root,2QWN0@2759|Eukaryota,37VME@33090|Viridiplantae,3GJZ7@35493|Streptophyta	35493|Streptophyta	-	-	-	-	-	-	-	-	-	-	-	-	-	-	Retrotran_gag_2,zf-CCHC
HiC_scaffold_4:14601431-14651431_26	38727.Pavir.J37834.1.p	2.38e-34	127.0	28HX8@1|root,2QQ85@2759|Eukaryota,37IS8@33090|Viridiplantae,3GBPT@35493|Streptophyta,3KM2D@4447|Liliopsida,3ID16@38820|Poales	35493|Streptophyta	S	Membrane protein of ER	-	GO:0000041,GO:0003674,GO:0005215,GO:0005381,GO:0005384,GO:0005575,GO:0005622,GO:0005623,GO:0005737,GO:0005783,GO:0006810,GO:0006811,GO:0006812,GO:0006826,GO:0006828,GO:0006873,GO:0006875,GO:0006879,GO:0006880,GO:0008150,GO:0008324,GO:0009987,GO:0010035,GO:0010038,GO:0010039,GO:0010168,GO:0012505,GO:0015075,GO:0015318,GO:0016020,GO:0019725,GO:0022857,GO:0022890,GO:0030001,GO:0030003,GO:0030026,GO:…	-	-	-	-	-	-	-	-	-	-	-
HiC_scaffold_4:14601431-14651431_44	4096.XP_009797900.1	2.96e-10	60.8	2CVAD@1|root,2RRMP@2759|Eukaryota,383NT@33090|Viridiplantae,3GUZD@35493|Streptophyta,44UKP@71274|asterids	35493|Streptophyta	-	-	-	-	-	-	-	-	-	-	-	-	-	-	-
HiC_scaffold_4:14601431-14651431_50	4113.PGSC0003DMT400074731	4.94e-12	64.7	2CVAD@1|root,2RRMP@2759|Eukaryota,383NT@33090|Viridiplantae,3GUZD@35493|Streptophyta,44UKP@71274|asterids	35493|Streptophyta	-	-	-	-	-	-	-	-	-	-	-	-	-	-	-
HiC_scaffold_4:14601431-14651431_53	50452.A0A087FZI0	5.72e-82	273.0	COG2801@1|root,KOG0017@2759|Eukaryota,37NRU@33090|Viridiplantae,3GGV0@35493|Streptophyta,3HXPF@3699|Brassicales	35493|Streptophyta	I	3-hydroxyisobutyryl-CoA hydrolase activity	-	GO:0000943,GO:0003674,GO:0003676,GO:0003723,GO:0003824,GO:0003887,GO:0003964,GO:0004518,GO:0004540,GO:0005488,GO:0005575,GO:0005622,GO:0005623,GO:0005634,GO:0006139,GO:0006259,GO:0006278,GO:0006508,GO:0006725,GO:0006807,GO:0008150,GO:0008152,GO:0008233,GO:0009058,GO:0009059,GO:0009987,GO:0016070,GO:0016740,GO:0016772,GO:0016779,GO:0016787,GO:0016788,GO:0018130,GO:0019438,GO:0019538,GO:0032196,GO:…	-	-	-	-	-	-	-	-	-	-	Chromo,RVP_2,RVT_1,Retrotrans_gag,rve
HiC_scaffold_4:14601431-14651431_54	50452.A0A087FZI0	2.23e-87	288.0	COG2801@1|root,KOG0017@2759|Eukaryota,37NRU@33090|Viridiplantae,3GGV0@35493|Streptophyta,3HXPF@3699|Brassicales	35493|Streptophyta	I	3-hydroxyisobutyryl-CoA hydrolase activity	-	GO:0000943,GO:0003674,GO:0003676,GO:0003723,GO:0003824,GO:0003887,GO:0003964,GO:0004518,GO:0004540,GO:0005488,GO:0005575,GO:0005622,GO:0005623,GO:0005634,GO:0006139,GO:0006259,GO:0006278,GO:0006508,GO:0006725,GO:0006807,GO:0008150,GO:0008152,GO:0008233,GO:0009058,GO:0009059,GO:0009987,GO:0016070,GO:0016740,GO:0016772,GO:0016779,GO:0016787,GO:0016788,GO:0018130,GO:0019438,GO:0019538,GO:0032196,GO:…	-	-	-	-	-	-	-	-	-	-	Chromo,RVP_2,RVT_1,Retrotrans_gag,rve
HiC_scaffold_4:14601431-14651431_56	4432.XP_010268537.1	5.84e-44	157.0	COG2801@1|root,KOG0017@2759|Eukaryota,37NRU@33090|Viridiplantae,3GGV0@35493|Streptophyta	35493|Streptophyta	E	L-threonine ammonia-lyase activity	-	GO:0000943,GO:0003674,GO:0003676,GO:0003723,GO:0003824,GO:0003887,GO:0003964,GO:0004518,GO:0004540,GO:0005488,GO:0005575,GO:0005622,GO:0005623,GO:0005634,GO:0006139,GO:0006259,GO:0006278,GO:0006508,GO:0006725,GO:0006807,GO:0008150,GO:0008152,GO:0008233,GO:0009058,GO:0009059,GO:0009987,GO:0016070,GO:0016740,GO:0016772,GO:0016779,GO:0016787,GO:0016788,GO:0018130,GO:0019438,GO:0019538,GO:0032196,GO:…	-	-	-	-	-	-	-	-	-	-	Chromo,RVP_2,RVT_1,Retrotrans_gag,rve
HiC_scaffold_4:14601431-14651431_65	40148.OGLUM08G17000.2	8.37e-188	554.0	COG2801@1|root,KOG0017@2759|Eukaryota,37Y2I@33090|Viridiplantae,3GPBU@35493|Streptophyta	35493|Streptophyta	L	GAG-pre-integrase domain	-	-	1.14.17.4	ko:K05933	ko00270,ko01100,ko01110,map00270,map01100,map01110	M00368	R07214	RC01868	ko00000,ko00001,ko00002,ko01000	-	-	-	gag_pre-integrs,rve
HiC_scaffold_9:113095650-113145650_4	4432.XP_010264998.1	3.1e-163	512.0	COG2801@1|root,KOG1057@1|root,KOG0017@2759|Eukaryota,KOG1057@2759|Eukaryota,37NJP@33090|Viridiplantae,3GD72@35493|Streptophyta	35493|Streptophyta	Z	Belongs to the histidine acid phosphatase family	-	-	2.7.4.24	ko:K13024	ko04070,map04070	-	R05799,R08964	RC00002	ko00000,ko00001,ko01000	-	-	-	His_Phos_2
HiC_scaffold_9:113095650-113145650_5	50452.A0A087G2C7	1.08e-24	102.0	COG2801@1|root,KOG0017@2759|Eukaryota,37NRU@33090|Viridiplantae,3GGV0@35493|Streptophyta,3HXPF@3699|Brassicales	35493|Streptophyta	I	3-hydroxyisobutyryl-CoA hydrolase activity	-	GO:0000943,GO:0003674,GO:0003676,GO:0003723,GO:0003824,GO:0003887,GO:0003964,GO:0004518,GO:0004540,GO:0005488,GO:0005575,GO:0005622,GO:0005623,GO:0005634,GO:0006139,GO:0006259,GO:0006278,GO:0006508,GO:0006725,GO:0006807,GO:0008150,GO:0008152,GO:0008233,GO:0009058,GO:0009059,GO:0009987,GO:0016070,GO:0016740,GO:0016772,GO:0016779,GO:0016787,GO:0016788,GO:0018130,GO:0019438,GO:0019538,GO:0032196,GO:…	-	-	-	-	-	-	-	-	-	-	Chromo,RVP_2,RVT_1,Retrotrans_gag,rve
HiC_scaffold_9:113095650-113145650_6	50452.A0A087H8D5	4.55e-212	642.0	COG1171@1|root,COG2801@1|root,KOG0017@2759|Eukaryota,KOG1250@2759|Eukaryota,37NRU@33090|Viridiplantae,3GGV0@35493|Streptophyta,3HXPF@3699|Brassicales	35493|Streptophyta	I	3-hydroxyisobutyryl-CoA hydrolase activity	-	GO:0000943,GO:0003674,GO:0003676,GO:0003723,GO:0003824,GO:0003887,GO:0003964,GO:0004518,GO:0004540,GO:0005488,GO:0005575,GO:0005622,GO:0005623,GO:0005634,GO:0006139,GO:0006259,GO:0006278,GO:0006508,GO:0006725,GO:0006807,GO:0008150,GO:0008152,GO:0008233,GO:0009058,GO:0009059,GO:0009987,GO:0016070,GO:0016740,GO:0016772,GO:0016779,GO:0016787,GO:0016788,GO:0018130,GO:0019438,GO:0019538,GO:0032196,GO:…	-	-	-	-	-	-	-	-	-	-	Chromo,RVP_2,RVT_1,Retrotrans_gag,rve
HiC_scaffold_9:113095650-113145650_8	2711.XP_006493522.1	3.18e-40	146.0	28W8B@1|root,2R30B@2759|Eukaryota,37X7C@33090|Viridiplantae,3GJR2@35493|Streptophyta	35493|Streptophyta	-	-	-	-	-	-	-	-	-	-	-	-	-	-	RVP_2,Retrotrans_gag
HiC_scaffold_9:113095650-113145650_16	4538.ORGLA01G0387300.1	3.72e-20	90.5	COG2801@1|root,KOG0017@2759|Eukaryota,37V5Q@33090|Viridiplantae,3GFFK@35493|Streptophyta,3M7B5@4447|Liliopsida,3IKJW@38820|Poales	35493|Streptophyta	L	transposition, RNA-mediated	-	-	-	-	-	-	-	-	-	-	-	-	DUF4219,RVT_2,Retrotran_gag_2,Retrotran_gag_3,gag_pre-integrs,rve,zf-CCHC
HiC_scaffold_9:113095650-113145650_18	3827.XP_004516804.1	1.5e-12	67.8	COG2801@1|root,KOG0017@2759|Eukaryota,37NGF@33090|Viridiplantae,3GGSM@35493|Streptophyta	35493|Streptophyta	G	transposition, RNA-mediated	-	-	-	-	-	-	-	-	-	-	-	-	RVT_2,gag_pre-integrs,rve
HiC_scaffold_9:113095650-113145650_19	400682.PAC_15728798	9.76e-14	70.9	COG2801@1|root,KOG0017@2759|Eukaryota,38DPC@33154|Opisthokonta	33154|Opisthokonta	J	Encoded by	-	-	-	-	-	-	-	-	-	-	-	-	RVT_2,Retrotran_gag_2,gag_pre-integrs,rve,zf-CCHC
HiC_scaffold_9:113095650-113145650_34	4096.XP_009774472.1	5.55e-34	124.0	28PZB@1|root,2QWN0@2759|Eukaryota,37VME@33090|Viridiplantae,3GJZ7@35493|Streptophyta,44TR6@71274|asterids	35493|Streptophyta	-	-	-	-	-	-	-	-	-	-	-	-	-	-	Retrotran_gag_2,zf-CCHC
HiC_scaffold_9:113095650-113145650_44	161934.XP_010687151.1	2.31e-42	151.0	COG2801@1|root,KOG0017@2759|Eukaryota,37UEI@33090|Viridiplantae,3GGWY@35493|Streptophyta	35493|Streptophyta	L	function	-	-	-	-	-	-	-	-	-	-	-	-	Asp_protease_2,Retrotrans_gag
HiC_scaffold_9:113095650-113145650_46	161934.XP_010683389.1	6.23e-63	223.0	COG2801@1|root,KOG0017@2759|Eukaryota,37RKH@33090|Viridiplantae,3GGZK@35493|Streptophyta	35493|Streptophyta	L	strictosidine synthase activity	-	-	-	-	-	-	-	-	-	-	-	-	RVT_1,Retrotrans_gag,rve
In total, 59 queries were scanned. Utilising the reference genome, sequences were generated encompassing a total of 50 kilobases, including 25 kilobases upstream and downstream of each significant SNP.
