# Supplementary material for: Uncovering the genomic basis of phenological traits in Chouardia litardierei (Asparagaceae) through a genome-wide association study (GWAS)
Source: Front Plant Sci. 2025 Apr 17;16:1571608. doi: 10.3389/fpls.2025.1571608 (PMC12070586; doi:10.3389/fpls.2025.1571608)
Supplement: Supplementary file 12 [file Table12.xlsx]

## Sheet: Sheet1
Table 1. EggNOG output file for 13 SNP loci that exceeded the genome-wide significance threshold (1 × 10−3) in the multivariate GWAS analysis of the Chouardia litardierei traits: BOS and VPD.
query	seed_ortholog	evalue	score	eggNOG_OGs	max_annot_lvl	COG_category	Description	Preferred_name	GOs	EC	KEGG_ko	KEGG_Pathway	KEGG_Module	KEGG_Reaction	KEGG_rclass	BRITE	KEGG_TC	CAZy	BiGG_Reaction	PFAMs
HiC_scaffold_14:64100165-64150165_29	4641.GSMUA_Achr5P24840_001	1.3e-26	103.0	COG2233@1|root,KOG1292@2759|Eukaryota,37NK6@33090|Viridiplantae,3GA2H@35493|Streptophyta,3KX80@4447|Liliopsida	35493|Streptophyta	F	Permease family	-	GO:0003674,GO:0005215,GO:0005345,GO:0005350,GO:0005575,GO:0005623,GO:0005886,GO:0005911,GO:0006810,GO:0006811,GO:0006812,GO:0006855,GO:0006863,GO:0008150,GO:0008324,GO:0009506,GO:0015075,GO:0015205,GO:0015207,GO:0015208,GO:0015210,GO:0015238,GO:0015291,GO:0015293,GO:0015294,GO:0015318,GO:0015851,GO:0015853,GO:0015854,GO:0015855,GO:0015857,GO:0015893,GO:0016020,GO:0022804,GO:0022857,GO:0022890,GO:…	-	ko:K14611	-	-	-	-	ko00000,ko02000	2.A.40.6	-	-	Xan_ur_permease
HiC_scaffold_14:64100165-64150165_35	15368.BRADI1G55520.1	4.68e-10	60.1	COG1019@1|root,KOG3351@2759|Eukaryota,37U57@33090|Viridiplantae,3GI2C@35493|Streptophyta,3KZ83@4447|Liliopsida,3I9CC@38820|Poales	35493|Streptophyta	S	Cytidylyltransferase-like	-	-	2.7.7.3	ko:K02201	ko00770,ko01100,map00770,map01100	M00120	R03035	RC00002	ko00000,ko00001,ko00002,ko01000	-	-	-	CTP_transf_like
HiC_scaffold_14:64100165-64150165_41	3750.XP_008385384.1	1.68e-25	105.0	2DPQX@1|root,2S6A3@2759|Eukaryota,37W15@33090|Viridiplantae,3GIZ0@35493|Streptophyta	35493|Streptophyta	S	gag-polypeptide of LTR copia-type	-	-	-	-	-	-	-	-	-	-	-	-	Retrotran_gag_2,zf-CCHC
HiC_scaffold_14:64100165-64150165_42	85681.XP_006436321.1	5.69e-14	73.6	2DPQX@1|root,2S6A3@2759|Eukaryota,37W15@33090|Viridiplantae,3GIZ0@35493|Streptophyta	35493|Streptophyta	S	gag-polypeptide of LTR copia-type	-	-	-	-	-	-	-	-	-	-	-	-	Retrotran_gag_2,zf-CCHC
HiC_scaffold_14:64100165-64150165_58	3827.XP_004514317.1	8.9e-30	119.0	2D0HN@1|root,2SE87@2759|Eukaryota,381H4@33090|Viridiplantae,3GY31@35493|Streptophyta	35493|Streptophyta	S	zinc finger	-	-	-	-	-	-	-	-	-	-	-	-	Retrotran_gag_2,zf-CCHC
HiC_scaffold_14:64100165-64150165_59	102107.XP_008229478.1	5.03e-45	169.0	COG2801@1|root,KOG0017@2759|Eukaryota,37SNQ@33090|Viridiplantae,3GHRQ@35493|Streptophyta	35493|Streptophyta	L	spliceosomal complex assembly	-	-	-	-	-	-	-	-	-	-	-	-	RVT_2,Retrotran_gag_2,gag_pre-integrs,rve,zf-CCHC
HiC_scaffold_14:64100165-64150165_60	3641.EOY03359	6.26e-25	102.0	COG2801@1|root,KOG0017@2759|Eukaryota,37SNQ@33090|Viridiplantae,3GHRQ@35493|Streptophyta	35493|Streptophyta	L	spliceosomal complex assembly	-	-	-	-	-	-	-	-	-	-	-	-	RVT_2,gag_pre-integrs,rve,zf-CCHC
HiC_scaffold_15:239041297-239091297_1	3659.XP_004148556.1	6.62e-12	67.0	COG2801@1|root,KOG0017@2759|Eukaryota,37V4J@33090|Viridiplantae,3GIPU@35493|Streptophyta,4JU63@91835|fabids	35493|Streptophyta	L	gag-polypeptide of LTR copia-type	-	-	-	-	-	-	-	-	-	-	-	-	Retrotran_gag_2,gag_pre-integrs,zf-CCHC
HiC_scaffold_15:239041297-239091297_12	2711.XP_006493522.1	1.69e-26	108.0	28W8B@1|root,2R30B@2759|Eukaryota,37X7C@33090|Viridiplantae,3GJR2@35493|Streptophyta	35493|Streptophyta	-	-	-	-	-	-	-	-	-	-	-	-	-	-	RVP_2,Retrotrans_gag
HiC_scaffold_15:239041297-239091297_66	3659.XP_004148556.1	1.49e-21	96.3	COG2801@1|root,KOG0017@2759|Eukaryota,37V4J@33090|Viridiplantae,3GIPU@35493|Streptophyta,4JU63@91835|fabids	35493|Streptophyta	L	gag-polypeptide of LTR copia-type	-	-	-	-	-	-	-	-	-	-	-	-	Retrotran_gag_2,gag_pre-integrs,zf-CCHC
HiC_scaffold_15:284653317-284703317_6	4530.OS01T0201000-01	1.08e-12	65.5	KOG0600@1|root,KOG0600@2759|Eukaryota,37SAM@33090|Viridiplantae,3G981@35493|Streptophyta,3KQJX@4447|Liliopsida,3I2HZ@38820|Poales	35493|Streptophyta	T	Protein kinase domain	-	GO:0003674,GO:0003824,GO:0004672,GO:0004674,GO:0004693,GO:0005575,GO:0005622,GO:0005623,GO:0005634,GO:0005886,GO:0006464,GO:0006468,GO:0006793,GO:0006796,GO:0006807,GO:0008150,GO:0008152,GO:0009987,GO:0016020,GO:0016301,GO:0016310,GO:0016740,GO:0016772,GO:0016773,GO:0019538,GO:0036211,GO:0043170,GO:0043226,GO:0043227,GO:0043229,GO:0043231,GO:0043412,GO:0044237,GO:0044238,GO:0044260,GO:0044267,GO:…	2.7.11.22,2.7.11.23	ko:K08819	-	-	-	-	ko00000,ko01000,ko01001	-	-	-	Pkinase
HiC_scaffold_15:284653317-284703317_20	981085.XP_010098040.1	1.32e-09	61.6	28W8B@1|root,2R30B@2759|Eukaryota,37X7C@33090|Viridiplantae,3GJR2@35493|Streptophyta,4JU9T@91835|fabids	35493|Streptophyta	-	-	-	-	-	-	-	-	-	-	-	-	-	-	RVP_2,Retrotrans_gag
HiC_scaffold_15:284653317-284703317_21	2711.XP_006493522.1	7.19e-39	147.0	28W8B@1|root,2R30B@2759|Eukaryota,37X7C@33090|Viridiplantae,3GJR2@35493|Streptophyta	35493|Streptophyta	-	-	-	-	-	-	-	-	-	-	-	-	-	-	RVP_2,Retrotrans_gag
HiC_scaffold_15:284653317-284703317_35	3656.XP_008453052.1	1.48e-37	136.0	COG2801@1|root,KOG0017@2759|Eukaryota,380EX@33090|Viridiplantae,3GQ9P@35493|Streptophyta	35493|Streptophyta	L	Integrase core domain	-	-	-	-	-	-	-	-	-	-	-	-	rve
HiC_scaffold_15:284653317-284703317_38	3712.Bo4g174850.1	2.62e-42	152.0	COG2801@1|root,KOG0017@2759|Eukaryota,37NRU@33090|Viridiplantae,3GGV0@35493|Streptophyta	35493|Streptophyta	E	L-threonine ammonia-lyase activity	-	-	-	-	-	-	-	-	-	-	-	-	RVP_2,RVT_1,Retrotrans_gag,gag-asp_proteas,rve
HiC_scaffold_15:284653317-284703317_39	4113.PGSC0003DMT400049462	1.33e-37	135.0	COG2801@1|root,KOG0017@2759|Eukaryota,37NRU@33090|Viridiplantae,3GGV0@35493|Streptophyta,44PGP@71274|asterids	35493|Streptophyta	L	Reverse transcriptase (RNA-dependent DNA polymerase)	-	GO:0000943,GO:0003674,GO:0003676,GO:0003723,GO:0003824,GO:0003887,GO:0003964,GO:0004518,GO:0004540,GO:0005488,GO:0005575,GO:0005622,GO:0005623,GO:0005634,GO:0006139,GO:0006259,GO:0006278,GO:0006508,GO:0006725,GO:0006807,GO:0008150,GO:0008152,GO:0008233,GO:0009058,GO:0009059,GO:0009987,GO:0016070,GO:0016740,GO:0016772,GO:0016779,GO:0016787,GO:0016788,GO:0018130,GO:0019438,GO:0019538,GO:0032196,GO:…	-	-	-	-	-	-	-	-	-	-	Chromo,RVP_2,RVT_1,Retrotrans_gag,rve
HiC_scaffold_15:284653317-284703317_45	3641.EOY03326	1.77e-306	890.0	COG2801@1|root,KOG0017@2759|Eukaryota,37RRH@33090|Viridiplantae,3G8MV@35493|Streptophyta	35493|Streptophyta	L	DNA RNA polymerases superfamily protein	-	-	-	-	-	-	-	-	-	-	-	-	RVP_2,RVT_1,Retrotrans_gag,rve,zf-CCHC
HiC_scaffold_15:284653317-284703317_46	102107.XP_008244885.1	2.69e-131	408.0	COG2801@1|root,KOG0017@2759|Eukaryota,37RRH@33090|Viridiplantae,3G8MV@35493|Streptophyta,4JM10@91835|fabids	35493|Streptophyta	H	transposition, RNA-mediated	-	GO:0000943,GO:0003674,GO:0003676,GO:0003723,GO:0003824,GO:0003887,GO:0003964,GO:0004518,GO:0004540,GO:0005488,GO:0005575,GO:0005622,GO:0005623,GO:0005634,GO:0006139,GO:0006259,GO:0006278,GO:0006508,GO:0006725,GO:0006807,GO:0008150,GO:0008152,GO:0008233,GO:0009058,GO:0009059,GO:0009987,GO:0016070,GO:0016740,GO:0016772,GO:0016779,GO:0016787,GO:0016788,GO:0018130,GO:0019438,GO:0019538,GO:0032196,GO:…	-	-	-	-	-	-	-	-	-	-	RVP_2,RVT_1,Retrotrans_gag,rve,zf-CCHC
HiC_scaffold_15:284653317-284703317_52	981085.XP_010098040.1	7.63e-10	60.8	28W8B@1|root,2R30B@2759|Eukaryota,37X7C@33090|Viridiplantae,3GJR2@35493|Streptophyta,4JU9T@91835|fabids	35493|Streptophyta	-	-	-	-	-	-	-	-	-	-	-	-	-	-	RVP_2,Retrotrans_gag
HiC_scaffold_15:284653317-284703317_53	2711.XP_006493522.1	1.37e-24	103.0	28W8B@1|root,2R30B@2759|Eukaryota,37X7C@33090|Viridiplantae,3GJR2@35493|Streptophyta	35493|Streptophyta	-	-	-	-	-	-	-	-	-	-	-	-	-	-	RVP_2,Retrotrans_gag
HiC_scaffold_15:284653317-284703317_58	42345.XP_008808125.1	4.59e-18	82.8	COG2801@1|root,KOG0017@2759|Eukaryota,37V4J@33090|Viridiplantae,3GIPU@35493|Streptophyta	35493|Streptophyta	L	gag-polypeptide of LTR copia-type	-	-	-	-	-	-	-	-	-	-	-	-	Retrotran_gag_2,gag_pre-integrs,zf-CCHC
HiC_scaffold_15:284653317-284703317_61	3641.EOY19682	2.18e-34	135.0	COG2801@1|root,KOG0017@2759|Eukaryota,37SNQ@33090|Viridiplantae,3GHRQ@35493|Streptophyta	35493|Streptophyta	L	spliceosomal complex assembly	-	-	-	-	-	-	-	-	-	-	-	-	RVT_2,Retrotran_gag_2,gag_pre-integrs,rve,zf-CCHC
HiC_scaffold_15:284653317-284703317_63	3641.EOY19682	6.44e-33	131.0	COG2801@1|root,KOG0017@2759|Eukaryota,37SNQ@33090|Viridiplantae,3GHRQ@35493|Streptophyta	35493|Streptophyta	L	spliceosomal complex assembly	-	-	-	-	-	-	-	-	-	-	-	-	RVT_2,Retrotran_gag_2,gag_pre-integrs,rve,zf-CCHC
HiC_scaffold_15:284653317-284703317_64	4081.Solyc03g062850.1.1	3.79e-102	316.0	COG2801@1|root,KOG0017@2759|Eukaryota,37SNQ@33090|Viridiplantae,3GHRQ@35493|Streptophyta	35493|Streptophyta	L	spliceosomal complex assembly	-	-	-	-	-	-	-	-	-	-	-	-	RVT_2
HiC_scaffold_15:284653317-284703317_65	4538.ORGLA06G0273300.1	2.41e-101	303.0	COG2801@1|root,KOG0017@2759|Eukaryota,37THH@33090|Viridiplantae,3GG2K@35493|Streptophyta,3M2IR@4447|Liliopsida,3INKC@38820|Poales	35493|Streptophyta	L	Reverse transcriptase (RNA-dependent DNA polymerase)	-	-	-	-	-	-	-	-	-	-	-	-	RVT_2,Retrotran_gag_2,zf-CCHC
HiC_scaffold_16:320398026-320448026_9	3659.XP_004148556.1	1.43e-39	143.0	COG2801@1|root,KOG0017@2759|Eukaryota,37V4J@33090|Viridiplantae,3GIPU@35493|Streptophyta,4JU63@91835|fabids	35493|Streptophyta	L	gag-polypeptide of LTR copia-type	-	-	-	-	-	-	-	-	-	-	-	-	Retrotran_gag_2,gag_pre-integrs,zf-CCHC
HiC_scaffold_16:320398026-320448026_29	4098.XP_009607415.1	1.42e-10	60.1	2D0PY@1|root,2SEY3@2759|Eukaryota	2759|Eukaryota	S	gag-polypeptide of LTR copia-type	-	-	-	-	-	-	-	-	-	-	-	-	Retrotran_gag_2
HiC_scaffold_16:320398026-320448026_30	3880.AES70645	2.75e-30	132.0	COG0144@1|root,COG2801@1|root,KOG0017@2759|Eukaryota,KOG1122@2759|Eukaryota,37M2F@33090|Viridiplantae,3GC52@35493|Streptophyta,4JGGR@91835|fabids	35493|Streptophyta	A	Belongs to the class I-like SAM-binding methyltransferase superfamily. RsmB NOP family	-	GO:0000027,GO:0000154,GO:0000470,GO:0001510,GO:0003674,GO:0003824,GO:0005575,GO:0005622,GO:0005623,GO:0005634,GO:0005730,GO:0006139,GO:0006364,GO:0006396,GO:0006725,GO:0006807,GO:0006996,GO:0008150,GO:0008152,GO:0008168,GO:0008169,GO:0008173,GO:0008284,GO:0008649,GO:0008757,GO:0009383,GO:0009451,GO:0009966,GO:0009987,GO:0010467,GO:0010646,GO:0016043,GO:0016070,GO:0016072,GO:0016434,GO:0016740,GO:…	2.1.1.310	ko:K14835	-	-	-	-	ko00000,ko01000,ko03009	-	-	-	Methyltr_RsmB-F,Methyltr_RsmF_N
HiC_scaffold_16:320398026-320448026_31	3641.EOY19682	8.14e-94	293.0	COG2801@1|root,KOG0017@2759|Eukaryota,37SNQ@33090|Viridiplantae,3GHRQ@35493|Streptophyta	35493|Streptophyta	L	spliceosomal complex assembly	-	-	-	-	-	-	-	-	-	-	-	-	RVT_2,Retrotran_gag_2,gag_pre-integrs,rve,zf-CCHC
HiC_scaffold_16:320398026-320448026_33	4081.Solyc03g062850.1.1	6.66e-58	196.0	COG2801@1|root,KOG0017@2759|Eukaryota,37SNQ@33090|Viridiplantae,3GHRQ@35493|Streptophyta	35493|Streptophyta	L	spliceosomal complex assembly	-	-	-	-	-	-	-	-	-	-	-	-	RVT_2
HiC_scaffold_16:320398026-320448026_34	3659.XP_004148197.1	1.36e-36	130.0	COG2801@1|root,KOG0017@2759|Eukaryota,37YGX@33090|Viridiplantae,3GN4T@35493|Streptophyta	35493|Streptophyta	L	transposition, RNA-mediated	-	-	-	-	-	-	-	-	-	-	-	-	RVT_2
HiC_scaffold_16:320398026-320448026_35	4558.Sb06g013016.1	3.88e-34	127.0	COG2801@1|root,KOG0017@2759|Eukaryota,37THH@33090|Viridiplantae,3GG2K@35493|Streptophyta,3M2IR@4447|Liliopsida,3INKC@38820|Poales	35493|Streptophyta	L	Reverse transcriptase (RNA-dependent DNA polymerase)	-	-	-	-	-	-	-	-	-	-	-	-	RVT_2,Retrotran_gag_2,zf-CCHC
HiC_scaffold_16:320398026-320448026_36	28532.XP_010519130.1	1.51e-19	85.9	COG2801@1|root,KOG0017@2759|Eukaryota,37SNQ@33090|Viridiplantae,3GHRQ@35493|Streptophyta	35493|Streptophyta	L	spliceosomal complex assembly	-	-	-	-	-	-	-	-	-	-	-	-	RVT_2,Retrotran_gag_2,gag_pre-integrs,rve,zf-CCHC
HiC_scaffold_16:320398026-320448026_38	3659.XP_004148556.1	1.35e-24	104.0	COG2801@1|root,KOG0017@2759|Eukaryota,37V4J@33090|Viridiplantae,3GIPU@35493|Streptophyta,4JU63@91835|fabids	35493|Streptophyta	L	gag-polypeptide of LTR copia-type	-	-	-	-	-	-	-	-	-	-	-	-	Retrotran_gag_2,gag_pre-integrs,zf-CCHC
HiC_scaffold_16:320398026-320448026_43	90675.XP_010451516.1	2.08e-264	807.0	COG2801@1|root,KOG0017@2759|Eukaryota,37SNQ@33090|Viridiplantae,3GHRQ@35493|Streptophyta,3HVU8@3699|Brassicales	35493|Streptophyta	L	GAG-pre-integrase domain	-	-	-	-	-	-	-	-	-	-	-	-	RVT_2,Retrotran_gag_2,gag_pre-integrs,rve,zf-CCHC
HiC_scaffold_16:320398026-320448026_57	42345.XP_008811778.1	3.11e-22	96.3	COG0534@1|root,KOG1347@2759|Eukaryota,37KAU@33090|Viridiplantae,3G8C8@35493|Streptophyta,3KUWT@4447|Liliopsida	35493|Streptophyta	V	Belongs to the multi antimicrobial extrusion (MATE) (TC 2.A.66.1) family	-	GO:0003674,GO:0005215,GO:0005575,GO:0005622,GO:0005623,GO:0005737,GO:0005773,GO:0005774,GO:0006810,GO:0006855,GO:0008150,GO:0009605,GO:0009607,GO:0009624,GO:0015238,GO:0015893,GO:0016020,GO:0022857,GO:0031090,GO:0042221,GO:0042493,GO:0043207,GO:0043226,GO:0043227,GO:0043229,GO:0043231,GO:0044422,GO:0044424,GO:0044437,GO:0044444,GO:0044446,GO:0044464,GO:0050896,GO:0051179,GO:0051234,GO:0051704,GO:…	-	ko:K03327	-	-	-	-	ko00000,ko02000	2.A.66.1	-	-	MatE
HiC_scaffold_16:437147692-437197692_12	29760.VIT_14s0083g00660.t01	4.77e-10	60.8	COG2801@1|root,KOG0017@2759|Eukaryota,37NRU@33090|Viridiplantae,3GGV0@35493|Streptophyta	35493|Streptophyta	E	L-threonine ammonia-lyase activity	-	-	-	-	-	-	-	-	-	-	-	-	RVP_2,RVT_1,Retrotrans_gag,rve
HiC_scaffold_16:437147692-437197692_16	50452.A0A087G2C7	4.29e-27	108.0	COG2801@1|root,KOG0017@2759|Eukaryota,37NRU@33090|Viridiplantae,3GGV0@35493|Streptophyta,3HXPF@3699|Brassicales	35493|Streptophyta	I	3-hydroxyisobutyryl-CoA hydrolase activity	-	GO:0000943,GO:0003674,GO:0003676,GO:0003723,GO:0003824,GO:0003887,GO:0003964,GO:0004518,GO:0004540,GO:0005488,GO:0005575,GO:0005622,GO:0005623,GO:0005634,GO:0006139,GO:0006259,GO:0006278,GO:0006508,GO:0006725,GO:0006807,GO:0008150,GO:0008152,GO:0008233,GO:0009058,GO:0009059,GO:0009987,GO:0016070,GO:0016740,GO:0016772,GO:0016779,GO:0016787,GO:0016788,GO:0018130,GO:0019438,GO:0019538,GO:0032196,GO:…	-	-	-	-	-	-	-	-	-	-	Chromo,RVP_2,RVT_1,Retrotrans_gag,rve
HiC_scaffold_16:437147692-437197692_23	3656.XP_008453052.1	9.11e-23	95.9	COG2801@1|root,KOG0017@2759|Eukaryota,380EX@33090|Viridiplantae,3GQ9P@35493|Streptophyta	35493|Streptophyta	L	Integrase core domain	-	-	-	-	-	-	-	-	-	-	-	-	rve
HiC_scaffold_16:437147692-437197692_24	981085.XP_010103426.1	2.78e-11	62.8	COG0398@1|root,COG2801@1|root,KOG0017@2759|Eukaryota,KOG3140@2759|Eukaryota,37I5C@33090|Viridiplantae,3G79Q@35493|Streptophyta,4JDF1@91835|fabids	35493|Streptophyta	L	TVP38 TMEM64 family membrane protein	-	-	-	-	-	-	-	-	-	-	-	-	SNARE_assoc
HiC_scaffold_16:437147692-437197692_25	50452.A0A087HNL4	4.14e-17	83.2	COG2801@1|root,KOG0017@2759|Eukaryota,37NRU@33090|Viridiplantae	33090|Viridiplantae	Q	microtubule motor activity	-	-	-	-	-	-	-	-	-	-	-	-	Chromo,RVP_2,RVT_1,Retrotrans_gag,rve
HiC_scaffold_16:437147692-437197692_30	3641.EOY08378	1.58e-20	90.1	COG2801@1|root,KOG0017@2759|Eukaryota,37M1D@33090|Viridiplantae,3GCV5@35493|Streptophyta	3641.EOY08378|-	O	DNA RNA polymerases superfamily protein	-	-	-	-	-	-	-	-	-	-	-	-	-
HiC_scaffold_16:437147692-437197692_31	3760.EMJ17846	8.35e-16	76.6	COG2801@1|root,KOG0017@2759|Eukaryota,37M1D@33090|Viridiplantae,3GCV5@35493|Streptophyta	3760.EMJ17846|-	O	DNA RNA polymerases superfamily protein	-	-	-	-	-	-	-	-	-	-	-	-	-
HiC_scaffold_16:437147692-437197692_33	3641.EOY19230	4.35e-24	95.9	COG2801@1|root,KOG0017@2759|Eukaryota,37M1D@33090|Viridiplantae,3GCV5@35493|Streptophyta	35493|Streptophyta	O	DNA RNA polymerases superfamily protein	-	-	-	-	-	-	-	-	-	-	-	-	RVT_1,Retrotrans_gag
HiC_scaffold_16:437147692-437197692_37	42345.XP_008812534.1	2.7e-12	67.0	COG2801@1|root,KOG0017@2759|Eukaryota,37M1D@33090|Viridiplantae,3GCV5@35493|Streptophyta	35493|Streptophyta	O	DNA RNA polymerases superfamily protein	-	-	-	-	-	-	-	-	-	-	-	-	Chromo,RVT_1,Retrotrans_gag,rve,zf-H2C2
HiC_scaffold_16:437147692-437197692_52	4096.XP_009789585.1	2.52e-61	204.0	28PZB@1|root,2QWN0@2759|Eukaryota,37VME@33090|Viridiplantae,3GM4V@35493|Streptophyta,44UCT@71274|asterids	35493|Streptophyta	-	-	-	-	-	-	-	-	-	-	-	-	-	-	Retrotran_gag_2
HiC_scaffold_16:437147692-437197692_53	57918.XP_004301938.1	2.8e-63	216.0	COG2801@1|root,KOG0017@2759|Eukaryota,37U72@33090|Viridiplantae,3GI5J@35493|Streptophyta	35493|Streptophyta	M	aspartic-type endopeptidase activity	-	-	-	-	-	-	-	-	-	-	-	-	RVT_2,rve
HiC_scaffold_16:437147692-437197692_54	57918.XP_004301938.1	1.49e-86	275.0	COG2801@1|root,KOG0017@2759|Eukaryota,37U72@33090|Viridiplantae,3GI5J@35493|Streptophyta	35493|Streptophyta	M	aspartic-type endopeptidase activity	-	-	-	-	-	-	-	-	-	-	-	-	RVT_2,rve
HiC_scaffold_16:437147692-437197692_55	57918.XP_004309897.1	1.47e-87	278.0	COG2801@1|root,KOG0017@2759|Eukaryota,37U72@33090|Viridiplantae,3GI5J@35493|Streptophyta	35493|Streptophyta	M	aspartic-type endopeptidase activity	-	-	-	-	-	-	-	-	-	-	-	-	RVT_2,rve
HiC_scaffold_16:437147692-437197692_56	13333.ERM98543	7.57e-102	303.0	COG2801@1|root,KOG0017@2759|Eukaryota,383NN@33090|Viridiplantae,3GNHS@35493|Streptophyta	35493|Streptophyta	L	transposition, RNA-mediated	-	-	-	-	-	-	-	-	-	-	-	-	-
HiC_scaffold_4:14601431-14651431_5	3750.XP_008390079.1	9.61e-26	106.0	COG2801@1|root,KOG4197@1|root,KOG0017@2759|Eukaryota,KOG4197@2759|Eukaryota,388J0@33090|Viridiplantae,3GXC7@35493|Streptophyta,4JF8V@91835|fabids	35493|Streptophyta	L	Pentatricopeptide repeat-containing protein	-	-	-	-	-	-	-	-	-	-	-	-	Glyco_hydro_28,PPR,PPR_2
HiC_scaffold_4:14601431-14651431_6	4538.ORGLA03G0406500.1	2.21e-68	220.0	COG2801@1|root,KOG0017@2759|Eukaryota,37YYP@33090|Viridiplantae,3GQD7@35493|Streptophyta,3M3FD@4447|Liliopsida,3IKKZ@38820|Poales	35493|Streptophyta	L	Reverse transcriptase (RNA-dependent DNA polymerase)	-	-	-	-	-	-	-	-	-	-	-	-	RVT_2
HiC_scaffold_4:14601431-14651431_7	4113.PGSC0003DMT400095085	3.57e-25	102.0	COG2801@1|root,KOG0017@2759|Eukaryota,37YIU@33090|Viridiplantae,3GNSS@35493|Streptophyta,44TRJ@71274|asterids	35493|Streptophyta	L	Integrase core domain	-	-	-	-	-	-	-	-	-	-	-	-	Retrotran_gag_2,rve
HiC_scaffold_4:14601431-14651431_8	3750.XP_008365345.1	1.45e-70	227.0	COG2801@1|root,COG5059@1|root,KOG0017@2759|Eukaryota,KOG4280@2759|Eukaryota,37RUZ@33090|Viridiplantae,3G9S6@35493|Streptophyta,4JHII@91835|fabids	35493|Streptophyta	Z	Belongs to the TRAFAC class myosin-kinesin ATPase superfamily. Kinesin family	KIN12B	GO:0000003,GO:0000226,GO:0000280,GO:0000910,GO:0003674,GO:0003774,GO:0003777,GO:0003824,GO:0005575,GO:0005622,GO:0005623,GO:0005737,GO:0005856,GO:0005871,GO:0005875,GO:0006928,GO:0006996,GO:0007010,GO:0007017,GO:0007018,GO:0007049,GO:0007112,GO:0007140,GO:0007275,GO:0007276,GO:0008150,GO:0008574,GO:0009524,GO:0009555,GO:0009987,GO:0015630,GO:0016043,GO:0016462,GO:0016787,GO:0016817,GO:0016818,GO:…	-	ko:K10400	-	-	-	-	ko00000,ko04812	-	-	-	Kinesin
HiC_scaffold_4:14601431-14651431_9	3760.EMJ04758	1.2e-43	151.0	2AXHF@1|root,2S012@2759|Eukaryota,37VRW@33090|Viridiplantae,3GPK5@35493|Streptophyta,4JU19@91835|fabids	35493|Streptophyta	S	Pfam:UBN2_2	-	-	-	-	-	-	-	-	-	-	-	-	Retrotran_gag_2,zf-CCHC
HiC_scaffold_4:14601431-14651431_10	3656.XP_008461736.1	9.41e-24	97.4	2AXHF@1|root,2S012@2759|Eukaryota,37VRW@33090|Viridiplantae,3GPK5@35493|Streptophyta,4JU19@91835|fabids	35493|Streptophyta	S	Pfam:UBN2_2	-	-	-	-	-	-	-	-	-	-	-	-	Retrotran_gag_2,zf-CCHC
HiC_scaffold_4:14601431-14651431_19	13333.ERM98543	1.3e-149	434.0	COG2801@1|root,KOG0017@2759|Eukaryota,383NN@33090|Viridiplantae,3GNHS@35493|Streptophyta	35493|Streptophyta	L	transposition, RNA-mediated	-	-	-	-	-	-	-	-	-	-	-	-	-
HiC_scaffold_4:14601431-14651431_20	57918.XP_004309292.1	1.09e-104	323.0	COG2801@1|root,KOG0017@2759|Eukaryota,37U72@33090|Viridiplantae,3GI5J@35493|Streptophyta	35493|Streptophyta	M	aspartic-type endopeptidase activity	-	-	-	-	-	-	-	-	-	-	-	-	RVT_2,rve
HiC_scaffold_4:14601431-14651431_21	57918.XP_004301938.1	2.94e-101	317.0	COG2801@1|root,KOG0017@2759|Eukaryota,37U72@33090|Viridiplantae,3GI5J@35493|Streptophyta	35493|Streptophyta	M	aspartic-type endopeptidase activity	-	-	-	-	-	-	-	-	-	-	-	-	RVT_2,rve
HiC_scaffold_4:14601431-14651431_22	161934.XP_010667383.1	2.19e-80	254.0	28PZB@1|root,2QWN0@2759|Eukaryota,37VME@33090|Viridiplantae,3GJZ7@35493|Streptophyta	35493|Streptophyta	-	-	-	-	-	-	-	-	-	-	-	-	-	-	Retrotran_gag_2,zf-CCHC
HiC_scaffold_4:14601431-14651431_29	4641.GSMUA_Achr6P36880_001	6.41e-09	60.5	28HX8@1|root,2QQ85@2759|Eukaryota,37IS8@33090|Viridiplantae,3GBPT@35493|Streptophyta,3KM2D@4447|Liliopsida	35493|Streptophyta	S	Membrane protein of ER	-	GO:0000041,GO:0003674,GO:0005215,GO:0005381,GO:0005384,GO:0005575,GO:0005622,GO:0005623,GO:0005737,GO:0005783,GO:0006810,GO:0006811,GO:0006812,GO:0006826,GO:0006828,GO:0006873,GO:0006875,GO:0006879,GO:0006880,GO:0008150,GO:0008324,GO:0009987,GO:0010035,GO:0010038,GO:0010039,GO:0010168,GO:0012505,GO:0015075,GO:0015318,GO:0016020,GO:0019725,GO:0022857,GO:0022890,GO:0030001,GO:0030003,GO:0030026,GO:…	-	-	-	-	-	-	-	-	-	-	-
HiC_scaffold_4:14601431-14651431_52	4096.XP_009797900.1	3.6e-10	60.8	2CVAD@1|root,2RRMP@2759|Eukaryota,383NT@33090|Viridiplantae,3GUZD@35493|Streptophyta,44UKP@71274|asterids	35493|Streptophyta	-	-	-	-	-	-	-	-	-	-	-	-	-	-	-
HiC_scaffold_4:14601431-14651431_57	4113.PGSC0003DMT400074731	1.68e-11	62.8	2CVAD@1|root,2RRMP@2759|Eukaryota,383NT@33090|Viridiplantae,3GUZD@35493|Streptophyta,44UKP@71274|asterids	35493|Streptophyta	-	-	-	-	-	-	-	-	-	-	-	-	-	-	-
HiC_scaffold_4:14601431-14651431_59	50452.A0A087FZI0	4.45e-82	273.0	COG2801@1|root,KOG0017@2759|Eukaryota,37NRU@33090|Viridiplantae,3GGV0@35493|Streptophyta,3HXPF@3699|Brassicales	35493|Streptophyta	I	3-hydroxyisobutyryl-CoA hydrolase activity	-	GO:0000943,GO:0003674,GO:0003676,GO:0003723,GO:0003824,GO:0003887,GO:0003964,GO:0004518,GO:0004540,GO:0005488,GO:0005575,GO:0005622,GO:0005623,GO:0005634,GO:0006139,GO:0006259,GO:0006278,GO:0006508,GO:0006725,GO:0006807,GO:0008150,GO:0008152,GO:0008233,GO:0009058,GO:0009059,GO:0009987,GO:0016070,GO:0016740,GO:0016772,GO:0016779,GO:0016787,GO:0016788,GO:0018130,GO:0019438,GO:0019538,GO:0032196,GO:…	-	-	-	-	-	-	-	-	-	-	Chromo,RVP_2,RVT_1,Retrotrans_gag,rve
HiC_scaffold_4:14601431-14651431_60	50452.A0A087FZI0	2.23e-87	288.0	COG2801@1|root,KOG0017@2759|Eukaryota,37NRU@33090|Viridiplantae,3GGV0@35493|Streptophyta,3HXPF@3699|Brassicales	35493|Streptophyta	I	3-hydroxyisobutyryl-CoA hydrolase activity	-	GO:0000943,GO:0003674,GO:0003676,GO:0003723,GO:0003824,GO:0003887,GO:0003964,GO:0004518,GO:0004540,GO:0005488,GO:0005575,GO:0005622,GO:0005623,GO:0005634,GO:0006139,GO:0006259,GO:0006278,GO:0006508,GO:0006725,GO:0006807,GO:0008150,GO:0008152,GO:0008233,GO:0009058,GO:0009059,GO:0009987,GO:0016070,GO:0016740,GO:0016772,GO:0016779,GO:0016787,GO:0016788,GO:0018130,GO:0019438,GO:0019538,GO:0032196,GO:…	-	-	-	-	-	-	-	-	-	-	Chromo,RVP_2,RVT_1,Retrotrans_gag,rve
HiC_scaffold_4:14601431-14651431_62	4432.XP_010268537.1	2.85e-47	167.0	COG2801@1|root,KOG0017@2759|Eukaryota,37NRU@33090|Viridiplantae,3GGV0@35493|Streptophyta	35493|Streptophyta	E	L-threonine ammonia-lyase activity	-	GO:0000943,GO:0003674,GO:0003676,GO:0003723,GO:0003824,GO:0003887,GO:0003964,GO:0004518,GO:0004540,GO:0005488,GO:0005575,GO:0005622,GO:0005623,GO:0005634,GO:0006139,GO:0006259,GO:0006278,GO:0006508,GO:0006725,GO:0006807,GO:0008150,GO:0008152,GO:0008233,GO:0009058,GO:0009059,GO:0009987,GO:0016070,GO:0016740,GO:0016772,GO:0016779,GO:0016787,GO:0016788,GO:0018130,GO:0019438,GO:0019538,GO:0032196,GO:…	-	-	-	-	-	-	-	-	-	-	Chromo,RVP_2,RVT_1,Retrotrans_gag,rve
HiC_scaffold_4:14601431-14651431_64	3659.XP_004160859.1	3.42e-18	79.3	COG2801@1|root,KOG0017@2759|Eukaryota,3801N@33090|Viridiplantae,3GQ09@35493|Streptophyta,4JUPJ@91835|fabids	35493|Streptophyta	L	transposition, RNA-mediated	-	-	-	-	-	-	-	-	-	-	-	-	Chromo
HiC_scaffold_4:14601431-14651431_73	4565.Traes_2AL_C6241FC7D.1	1.68e-10	60.1	COG2801@1|root,KOG0017@2759|Eukaryota,37SCF@33090|Viridiplantae,3GAWJ@35493|Streptophyta,3M6DY@4447|Liliopsida,3IQNT@38820|Poales	35493|Streptophyta	L	Retrotransposon gag protein	-	-	-	-	-	-	-	-	-	-	-	-	Retrotran_gag_2,Retrotran_gag_3,Retrotrans_gag
HiC_scaffold_4:14601431-14651431_74	40148.OGLUM08G17000.2	8.37e-188	554.0	COG2801@1|root,KOG0017@2759|Eukaryota,37Y2I@33090|Viridiplantae,3GPBU@35493|Streptophyta	35493|Streptophyta	L	GAG-pre-integrase domain	-	-	1.14.17.4	ko:K05933	ko00270,ko01100,ko01110,map00270,map01100,map01110	M00368	R07214	RC01868	ko00000,ko00001,ko00002,ko01000	-	-	-	gag_pre-integrs,rve
HiC_scaffold_12:163416584-163466584_2	4530.OS03T0843900-01	2.07e-16	79.0	KOG2064@1|root,KOG2064@2759|Eukaryota,37Q5Y@33090|Viridiplantae,3GAAQ@35493|Streptophyta,3KX5U@4447|Liliopsida,3I9JI@38820|Poales	35493|Streptophyta	T	Poly (ADP-ribose) glycohydrolase (PARG)	-	GO:0001101,GO:0003674,GO:0003824,GO:0004553,GO:0004649,GO:0006282,GO:0006950,GO:0006952,GO:0006970,GO:0006974,GO:0006979,GO:0008150,GO:0009414,GO:0009415,GO:0009605,GO:0009607,GO:0009620,GO:0009628,GO:0009987,GO:0010035,GO:0010118,GO:0016787,GO:0016798,GO:0019219,GO:0019222,GO:0031323,GO:0033554,GO:0042221,GO:0043207,GO:0048583,GO:0050789,GO:0050794,GO:0050832,GO:0050896,GO:0051052,GO:0051171,GO:…	3.2.1.143	ko:K07759	-	-	-	-	ko00000,ko01000	-	-	-	PARG_cat
HiC_scaffold_12:163416584-163466584_7	981085.XP_010098040.1	3.15e-18	84.7	28W8B@1|root,2R30B@2759|Eukaryota,37X7C@33090|Viridiplantae,3GJR2@35493|Streptophyta,4JU9T@91835|fabids	35493|Streptophyta	-	-	-	-	-	-	-	-	-	-	-	-	-	-	RVP_2,Retrotrans_gag
HiC_scaffold_12:163416584-163466584_38	4081.Solyc12g096600.1.1	1.94e-13	68.9	KOG2064@1|root,KOG2064@2759|Eukaryota,37Q5Y@33090|Viridiplantae,3GAAQ@35493|Streptophyta	35493|Streptophyta	T	Poly(ADP-ribose) glycohydrolase	-	GO:0001101,GO:0003674,GO:0003824,GO:0004553,GO:0004649,GO:0006282,GO:0006950,GO:0006952,GO:0006970,GO:0006974,GO:0006979,GO:0008150,GO:0009414,GO:0009415,GO:0009605,GO:0009607,GO:0009620,GO:0009628,GO:0009987,GO:0010035,GO:0010118,GO:0016787,GO:0016798,GO:0019219,GO:0019222,GO:0031323,GO:0033554,GO:0042221,GO:0043207,GO:0048583,GO:0050789,GO:0050794,GO:0050832,GO:0050896,GO:0051052,GO:0051171,GO:…	3.2.1.143	ko:K07759	-	-	-	-	ko00000,ko01000	-	-	-	PARG_cat
HiC_scaffold_12:163416584-163466584_59	3983.cassava4.1_023660m	4.4e-26	106.0	KOG2064@1|root,KOG2064@2759|Eukaryota,37Q5Y@33090|Viridiplantae,3GAAQ@35493|Streptophyta,4JN8J@91835|fabids	35493|Streptophyta	T	Poly(ADP-ribose) glycohydrolase	-	GO:0001101,GO:0003674,GO:0003824,GO:0004553,GO:0004649,GO:0006282,GO:0006950,GO:0006952,GO:0006970,GO:0006974,GO:0006979,GO:0008150,GO:0009414,GO:0009415,GO:0009605,GO:0009607,GO:0009620,GO:0009628,GO:0009987,GO:0010035,GO:0010118,GO:0016787,GO:0016798,GO:0019219,GO:0019222,GO:0031323,GO:0033554,GO:0042221,GO:0043207,GO:0048583,GO:0050789,GO:0050794,GO:0050832,GO:0050896,GO:0051052,GO:0051171,GO:…	3.2.1.143	ko:K07759	-	-	-	-	ko00000,ko01000	-	-	-	PARG_cat
HiC_scaffold_4:345741799-345791799_9	4096.XP_009803089.1	2.09e-24	102.0	COG0515@1|root,KOG1187@2759|Eukaryota,37NWU@33090|Viridiplantae,3GHDJ@35493|Streptophyta,44C7G@71274|asterids	35493|Streptophyta	T	Calmodulin-binding receptor-like cytoplasmic kinase 3	-	-	2.7.11.1	ko:K04733	ko04010,ko04064,ko04620,ko04621,ko04624,ko04722,ko05133,ko05140,ko05142,ko05145,ko05152,ko05162,ko05164,map04010,map04064,map04620,map04621,map04624,map04722,map05133,map05140,map05142,map05145,map05152,map05162,map05164	M00686	-	-	ko00000,ko00001,ko00002,ko01000,ko01001	-	-	-	Pkinase,Pkinase_Tyr
HiC_scaffold_4:345741799-345791799_29	3659.XP_004140381.1	1.58e-14	71.6	28JZP@1|root,2QSE3@2759|Eukaryota,37QZD@33090|Viridiplantae,3GGZ7@35493|Streptophyta,4JS72@91835|fabids	35493|Streptophyta	S	Encoded by	-	-	-	-	-	-	-	-	-	-	-	-	DBD_Tnp_Mut,MULE,SWIM
HiC_scaffold_4:345741799-345791799_43	3694.POPTR_0007s05830.1	1.43e-13	70.9	KOG1075@1|root,KOG1075@2759|Eukaryota,380JW@33090|Viridiplantae,3GQ8I@35493|Streptophyta,4JUP9@91835|fabids	35493|Streptophyta	S	ribonuclease H protein	-	-	-	-	-	-	-	-	-	-	-	-	RVT_3
HiC_scaffold_4:345741799-345791799_46	4558.Sb07g002160.1	2.05e-18	86.7	KOG1075@1|root,KOG1075@2759|Eukaryota,381EF@33090|Viridiplantae,3GQGN@35493|Streptophyta,3M6D4@4447|Liliopsida,3IM72@38820|Poales	35493|Streptophyta	S	Reverse transcriptase-like	-	-	-	-	-	-	-	-	-	-	-	-	RVT_3
HiC_scaffold_4:345741799-345791799_51	161934.XP_010666466.1	1.66e-29	121.0	KOG1075@1|root,KOG1075@2759|Eukaryota,380FB@33090|Viridiplantae,3GPVX@35493|Streptophyta	35493|Streptophyta	S	Ribonuclease H protein	-	-	-	-	-	-	-	-	-	-	-	-	Exo_endo_phos
HiC_scaffold_4:345741799-345791799_52	161934.XP_010694404.1	6.6e-14	72.0	KOG1075@1|root,KOG1075@2759|Eukaryota,38067@33090|Viridiplantae,3GPW4@35493|Streptophyta	35493|Streptophyta	S	Ribonuclease H protein	-	-	-	-	-	-	-	-	-	-	-	-	-
HiC_scaffold_4:345741799-345791799_63	3641.EOY08813	5.35e-42	144.0	COG2801@1|root,KOG0017@2759|Eukaryota,37YCB@33090|Viridiplantae,3GII4@35493|Streptophyta	35493|Streptophyta	L	transposition, RNA-mediated	-	-	-	ko:K18667	-	-	-	-	ko00000	-	-	-	-
HiC_scaffold_4:345741799-345791799_66	4096.XP_009773227.1	1.11e-31	120.0	COG2801@1|root,KOG0017@2759|Eukaryota,37RRH@33090|Viridiplantae,3GPWI@35493|Streptophyta,44Q6H@71274|asterids	33090|Viridiplantae	P	DNA RNA polymerases superfamily protein	-	-	-	ko:K09250	-	-	-	-	ko00000,ko03000	-	-	-	RVP_2,RVT_1,Retrotrans_gag,rve,zf-CCHC
HiC_scaffold_4:345741799-345791799_67	102107.XP_008227646.1	3.46e-33	128.0	COG2801@1|root,KOG0017@2759|Eukaryota,37RRH@33090|Viridiplantae,3G8MV@35493|Streptophyta	35493|Streptophyta	L	DNA RNA polymerases superfamily protein	-	-	-	ko:K09250	-	-	-	-	ko00000,ko03000	-	-	-	RVP_2,RVT_1,Retrotrans_gag,rve,zf-CCHC
HiC_scaffold_4:345741799-345791799_69	42345.XP_008798775.1	4.66e-118	386.0	COG2801@1|root,KOG0017@2759|Eukaryota,37RRH@33090|Viridiplantae,3G8MV@35493|Streptophyta,3M4DI@4447|Liliopsida	35493|Streptophyta	L	DNA RNA polymerases superfamily protein	-	GO:0000943,GO:0003674,GO:0003676,GO:0003723,GO:0003824,GO:0003887,GO:0003964,GO:0004518,GO:0004540,GO:0005488,GO:0005575,GO:0005622,GO:0005623,GO:0005634,GO:0006139,GO:0006259,GO:0006278,GO:0006508,GO:0006725,GO:0006807,GO:0008150,GO:0008152,GO:0008233,GO:0009058,GO:0009059,GO:0009987,GO:0016070,GO:0016740,GO:0016772,GO:0016779,GO:0016787,GO:0016788,GO:0018130,GO:0019438,GO:0019538,GO:0032196,GO:…	-	-	-	-	-	-	-	-	-	-	RVP_2,RVT_1,Retrotrans_gag,rve,zf-CCHC
HiC_scaffold_4:93348391-93398391_8	71139.XP_010026793.1	3.92e-300	881.0	COG2801@1|root,KOG0017@2759|Eukaryota,37RRH@33090|Viridiplantae,3G8MV@35493|Streptophyta	35493|Streptophyta	L	DNA RNA polymerases superfamily protein	-	GO:0000943,GO:0003674,GO:0003676,GO:0003723,GO:0003824,GO:0003887,GO:0003964,GO:0004518,GO:0004540,GO:0005488,GO:0005575,GO:0005622,GO:0005623,GO:0005634,GO:0006139,GO:0006259,GO:0006278,GO:0006508,GO:0006725,GO:0006807,GO:0008150,GO:0008152,GO:0008233,GO:0009058,GO:0009059,GO:0009987,GO:0016070,GO:0016740,GO:0016772,GO:0016779,GO:0016787,GO:0016788,GO:0018130,GO:0019438,GO:0019538,GO:0032196,GO:…	-	-	-	-	-	-	-	-	-	-	RVP_2,RVT_1,Retrotrans_gag,rve,zf-CCHC
HiC_scaffold_4:93348391-93398391_9	102107.XP_008244885.1	3.77e-131	407.0	COG2801@1|root,KOG0017@2759|Eukaryota,37RRH@33090|Viridiplantae,3G8MV@35493|Streptophyta,4JM10@91835|fabids	35493|Streptophyta	H	transposition, RNA-mediated	-	GO:0000943,GO:0003674,GO:0003676,GO:0003723,GO:0003824,GO:0003887,GO:0003964,GO:0004518,GO:0004540,GO:0005488,GO:0005575,GO:0005622,GO:0005623,GO:0005634,GO:0006139,GO:0006259,GO:0006278,GO:0006508,GO:0006725,GO:0006807,GO:0008150,GO:0008152,GO:0008233,GO:0009058,GO:0009059,GO:0009987,GO:0016070,GO:0016740,GO:0016772,GO:0016779,GO:0016787,GO:0016788,GO:0018130,GO:0019438,GO:0019538,GO:0032196,GO:…	-	-	-	-	-	-	-	-	-	-	RVP_2,RVT_1,Retrotrans_gag,rve,zf-CCHC
HiC_scaffold_4:93348391-93398391_38	3750.XP_008355958.1	2.4e-39	146.0	COG2801@1|root,KOG2288@1|root,KOG0017@2759|Eukaryota,KOG2288@2759|Eukaryota,37YFR@33090|Viridiplantae,3GNC7@35493|Streptophyta,4JVMK@91835|fabids	35493|Streptophyta	G	beta-1,3-galactosyltransferase 3	-	-	-	ko:K20855	-	-	-	-	ko00000,ko01000,ko01003	-	GT31	-	DUF4094,Galactosyl_T
HiC_scaffold_4:93348391-93398391_39	4558.Sb08g005122.1	2.76e-42	144.0	COG2801@1|root,KOG0017@2759|Eukaryota,37YYP@33090|Viridiplantae,3GQD7@35493|Streptophyta,3M3FD@4447|Liliopsida,3IKKZ@38820|Poales	35493|Streptophyta	L	Reverse transcriptase (RNA-dependent DNA polymerase)	-	-	-	-	-	-	-	-	-	-	-	-	RVT_2
HiC_scaffold_4:93348391-93398391_42	4081.Solyc11g051150.1.1	1.56e-31	122.0	COG2801@1|root,KOG0017@2759|Eukaryota,37THH@33090|Viridiplantae,3GG2K@35493|Streptophyta,44UC5@71274|asterids	35493|Streptophyta	L	Mitochondrial protein	-	-	-	-	-	-	-	-	-	-	-	-	RVT_2,Retrotran_gag_2,Retrotran_gag_3,Retrotrans_gag,gag_pre-integrs,rve,zf-CCHC
HiC_scaffold_4:93348391-93398391_43	102107.XP_008223780.1	3.45e-62	215.0	COG2801@1|root,KOG1192@1|root,KOG0017@2759|Eukaryota,KOG1192@2759|Eukaryota	2759|Eukaryota	G	transferase activity, transferring hexosyl groups	-	-	-	-	-	-	-	-	-	-	-	-	UDPGT
HiC_scaffold_4:93348391-93398391_44	4113.PGSC0003DMT400095085	3.49e-31	116.0	COG2801@1|root,KOG0017@2759|Eukaryota,37YIU@33090|Viridiplantae,3GNSS@35493|Streptophyta,44TRJ@71274|asterids	35493|Streptophyta	L	Integrase core domain	-	-	-	-	-	-	-	-	-	-	-	-	Retrotran_gag_2,rve
HiC_scaffold_4:93348391-93398391_45	4096.XP_009783587.1	1.02e-19	86.7	COG2801@1|root,KOG0017@2759|Eukaryota,37YIU@33090|Viridiplantae,3GNSS@35493|Streptophyta,44TRJ@71274|asterids	35493|Streptophyta	L	Integrase core domain	-	-	-	-	-	-	-	-	-	-	-	-	Retrotran_gag_2,rve
HiC_scaffold_4:93348391-93398391_46	981085.XP_010110616.1	5.13e-29	115.0	COG2801@1|root,KOG0017@2759|Eukaryota,37ZS3@33090|Viridiplantae,3GXKU@35493|Streptophyta,4JU31@91835|fabids	35493|Streptophyta	L	Retrovirus-related Pol polyprotein from transposon TNT 1-94	-	-	-	-	-	-	-	-	-	-	-	-	Retrotran_gag_2,gag_pre-integrs
HiC_scaffold_4:93348391-93398391_47	4096.XP_009793136.1	2.17e-19	85.5	COG2801@1|root,KOG0017@2759|Eukaryota,3816N@33090|Viridiplantae,3GR0A@35493|Streptophyta	35493|Streptophyta	L	gag-polypeptide of LTR copia-type	-	-	-	-	-	-	-	-	-	-	-	-	Retrotran_gag_2
HiC_scaffold_4:93348391-93398391_48	72664.XP_006408604.1	3.39e-25	103.0	COG2801@1|root,KOG0017@2759|Eukaryota,3816N@33090|Viridiplantae,3GQF3@35493|Streptophyta,3I171@3699|Brassicales	35493|Streptophyta	L	gag-polypeptide of LTR copia-type	-	-	-	-	-	-	-	-	-	-	-	-	Retrotran_gag_2,zf-CCHC
HiC_scaffold_4:93348391-93398391_49	4096.XP_009794640.1	9.17e-62	197.0	COG2801@1|root,KOG0017@2759|Eukaryota,3816N@33090|Viridiplantae,3GR0A@35493|Streptophyta	33090|Viridiplantae	L	gag-polypeptide of LTR copia-type	-	-	-	-	-	-	-	-	-	-	-	-	Retrotran_gag_2,zf-CCHC
HiC_scaffold_4:93348391-93398391_54	4572.TRIUR3_07601-P1	2.18e-60	194.0	COG2801@1|root,KOG0017@2759|Eukaryota,37NGF@33090|Viridiplantae,3GGSM@35493|Streptophyta	35493|Streptophyta	G	transposition, RNA-mediated	-	-	-	-	-	-	-	-	-	-	-	-	-
HiC_scaffold_4:93348391-93398391_55	3827.XP_004516035.1	7.55e-163	515.0	COG2801@1|root,KOG0017@2759|Eukaryota,388SY@33090|Viridiplantae,3GND2@35493|Streptophyta	35493|Streptophyta	L	DNA RNA polymerases superfamily protein	-	-	-	-	-	-	-	-	-	-	-	-	RVP_2,Retrotrans_gag,zf-CCHC
HiC_scaffold_4:93348391-93398391_56	4096.XP_009794640.1	1.44e-95	287.0	COG2801@1|root,KOG0017@2759|Eukaryota,3816N@33090|Viridiplantae,3GR0A@35493|Streptophyta	33090|Viridiplantae	L	gag-polypeptide of LTR copia-type	-	-	-	-	-	-	-	-	-	-	-	-	Retrotran_gag_2,zf-CCHC
HiC_scaffold_12:26208589-26258589_30	4096.XP_009768097.1	1.06e-13	71.6	COG2801@1|root,KOG0017@2759|Eukaryota,383NN@33090|Viridiplantae,3GNHS@35493|Streptophyta	4096.XP_009768097.1|-	L	transposition, RNA-mediated	-	-	-	-	-	-	-	-	-	-	-	-	-
HiC_scaffold_12:26208589-26258589_31	3712.Bo12563s010.1	8.11e-28	103.0	COG2801@1|root,KOG0017@2759|Eukaryota,37U72@33090|Viridiplantae,3GI5J@35493|Streptophyta	35493|Streptophyta	M	aspartic-type endopeptidase activity	-	-	-	-	-	-	-	-	-	-	-	-	RVT_2,rve
HiC_scaffold_12:26208589-26258589_33	161934.XP_010666579.1	1.96e-26	108.0	28PZB@1|root,2QWN0@2759|Eukaryota,37VME@33090|Viridiplantae,3GR2K@35493|Streptophyta	35493|Streptophyta	-	-	-	-	-	-	-	-	-	-	-	-	-	-	zf-CCHC
HiC_scaffold_12:26208589-26258589_34	4096.XP_009774472.1	3.61e-14	71.2	28PZB@1|root,2QWN0@2759|Eukaryota,37VME@33090|Viridiplantae,3GJZ7@35493|Streptophyta,44TR6@71274|asterids	35493|Streptophyta	-	-	-	-	-	-	-	-	-	-	-	-	-	-	Retrotran_gag_2,zf-CCHC
HiC_scaffold_12:26208589-26258589_36	4096.XP_009768097.1	7.94e-22	93.2	COG2801@1|root,KOG0017@2759|Eukaryota,383NN@33090|Viridiplantae,3GNHS@35493|Streptophyta	4096.XP_009768097.1|-	L	transposition, RNA-mediated	-	-	-	-	-	-	-	-	-	-	-	-	-
HiC_scaffold_12:26208589-26258589_37	3712.Bo12563s010.1	3.46e-29	107.0	COG2801@1|root,KOG0017@2759|Eukaryota,37U72@33090|Viridiplantae,3GI5J@35493|Streptophyta	35493|Streptophyta	M	aspartic-type endopeptidase activity	-	-	-	-	-	-	-	-	-	-	-	-	RVT_2,rve
HiC_scaffold_12:26208589-26258589_40	161934.XP_010695582.1	3.85e-17	80.1	28PZB@1|root,2QWN0@2759|Eukaryota,37VME@33090|Viridiplantae,3GJZ7@35493|Streptophyta	35493|Streptophyta	-	-	-	-	-	-	-	-	-	-	-	-	-	-	Retrotran_gag_2,zf-CCHC
HiC_scaffold_12:26208589-26258589_47	4641.GSMUA_Achr4P24810_001	1.1e-32	123.0	COG4286@1|root,KOG2948@2759|Eukaryota,37MFS@33090|Viridiplantae,3GAGR@35493|Streptophyta,3KM5R@4447|Liliopsida	35493|Streptophyta	S	Uncharacterised protein family (UPF0160)	-	-	-	-	-	-	-	-	-	-	-	-	UPF0160
HiC_scaffold_12:26208589-26258589_48	71139.XP_010050373.1	6e-76	237.0	COG2801@1|root,KOG1867@1|root,KOG0017@2759|Eukaryota,KOG1867@2759|Eukaryota,37SCF@33090|Viridiplantae,3GAWJ@35493|Streptophyta	35493|Streptophyta	O	transposition, RNA-mediated	-	-	-	-	-	-	-	-	-	-	-	-	Retrotran_gag_2,Retrotran_gag_3,Retrotrans_gag,zf-CCHC
HiC_scaffold_12:26208589-26258589_49	225117.XP_009348351.1	2.03e-103	336.0	COG2801@1|root,KOG0017@2759|Eukaryota,37W11@33090|Viridiplantae	33090|Viridiplantae	L	transposition, RNA-mediated	-	-	-	-	-	-	-	-	-	-	-	-	Retrotran_gag_2,Retrotran_gag_3,Retrotrans_gag,gag_pre-integrs,rve
HiC_scaffold_12:26208589-26258589_50	3641.EOX99943	1.17e-68	226.0	COG2801@1|root,KOG0017@2759|Eukaryota,37RIF@33090|Viridiplantae,3G9AM@35493|Streptophyta	35493|Streptophyta	K	cysteine-rich RLK (RECEPTOR-like protein kinase) 8	-	-	-	-	-	-	-	-	-	-	-	-	RVT_2,Retrotran_gag_2,Retrotran_gag_3,Retrotrans_gag,gag_pre-integrs,rve
HiC_scaffold_12:26208589-26258589_51	3641.EOY16636	1.11e-124	390.0	COG2801@1|root,KOG0017@2759|Eukaryota,37RIF@33090|Viridiplantae,3GFVM@35493|Streptophyta	35493|Streptophyta	L	Cysteine-rich RLK (RECEPTOR-like protein kinase) 8	-	-	-	-	-	-	-	-	-	-	-	-	RVT_2,Retrotran_gag_3
HiC_scaffold_12:26208589-26258589_59	3880.AES87096	2.47e-33	116.0	COG4286@1|root,KOG2948@2759|Eukaryota,37MFS@33090|Viridiplantae,3GAGR@35493|Streptophyta,4JJPM@91835|fabids	35493|Streptophyta	S	UPF0160 protein-like	-	-	-	-	-	-	-	-	-	-	-	-	UPF0160
HiC_scaffold_12:64478815-64528815_2	4096.XP_009773227.1	1.44e-12	68.2	COG2801@1|root,KOG0017@2759|Eukaryota,37RRH@33090|Viridiplantae,3GPWI@35493|Streptophyta,44Q6H@71274|asterids	33090|Viridiplantae	P	DNA RNA polymerases superfamily protein	-	-	-	ko:K09250	-	-	-	-	ko00000,ko03000	-	-	-	RVP_2,RVT_1,Retrotrans_gag,rve,zf-CCHC
HiC_scaffold_12:64478815-64528815_3	4513.MLOC_11608.2	2.78e-11	62.8	COG2801@1|root,KOG0017@2759|Eukaryota,37NRU@33090|Viridiplantae,3GGV0@35493|Streptophyta,3M4R8@4447|Liliopsida,3IK9Z@38820|Poales	35493|Streptophyta	L	transposition, RNA-mediated	-	-	-	-	-	-	-	-	-	-	-	-	RVP_2,RVT_1,Retrotrans_gag,rve
HiC_scaffold_12:64478815-64528815_22	981085.XP_010098040.1	4.42e-09	60.5	28W8B@1|root,2R30B@2759|Eukaryota,37X7C@33090|Viridiplantae,3GJR2@35493|Streptophyta,4JU9T@91835|fabids	35493|Streptophyta	-	-	-	-	-	-	-	-	-	-	-	-	-	-	RVP_2,Retrotrans_gag
HiC_scaffold_12:64478815-64528815_23	2711.XP_006493522.1	5.61e-45	163.0	28W8B@1|root,2R30B@2759|Eukaryota,37X7C@33090|Viridiplantae,3GJR2@35493|Streptophyta	35493|Streptophyta	-	-	-	-	-	-	-	-	-	-	-	-	-	-	RVP_2,Retrotrans_gag
HiC_scaffold_12:64478815-64528815_26	3694.POPTR_0011s02700.1	1.48e-17	90.5	KOG1075@1|root,KOG1075@2759|Eukaryota	2759|Eukaryota	E	Ribonuclease H protein	-	-	-	-	-	-	-	-	-	-	-	-	DUF4283,zf-CCHC_4
HiC_scaffold_9:206908711-206958711_4	3712.Bo6g049300.1	3.68e-85	275.0	COG2801@1|root,KOG0017@2759|Eukaryota,37THH@33090|Viridiplantae,3GG2K@35493|Streptophyta	35493|Streptophyta	O	Mitochondrial protein	-	-	-	-	-	-	-	-	-	-	-	-	RVT_2,Retrotran_gag_2,Retrotran_gag_3,Retrotrans_gag,gag_pre-integrs,rve,zf-CCHC
HiC_scaffold_9:206908711-206958711_5	4081.Solyc11g062200.1.1	1.5e-241	711.0	COG2801@1|root,KOG0017@2759|Eukaryota,37THH@33090|Viridiplantae,3GG2K@35493|Streptophyta,44UC5@71274|asterids	35493|Streptophyta	L	Mitochondrial protein	-	-	-	-	-	-	-	-	-	-	-	-	RVT_2,Retrotran_gag_2,Retrotran_gag_3,Retrotrans_gag,gag_pre-integrs,rve,zf-CCHC
HiC_scaffold_9:206908711-206958711_6	4081.Solyc01g034160.1.1	3.73e-47	160.0	COG2801@1|root,KOG0017@2759|Eukaryota,37THH@33090|Viridiplantae,3GG2K@35493|Streptophyta,44UC5@71274|asterids	35493|Streptophyta	L	Mitochondrial protein	-	-	-	-	-	-	-	-	-	-	-	-	RVT_2,Retrotran_gag_2,Retrotran_gag_3,Retrotrans_gag,gag_pre-integrs,rve,zf-CCHC
HiC_scaffold_9:206908711-206958711_7	42345.XP_008776481.1	8.33e-38	135.0	COG2801@1|root,KOG0017@2759|Eukaryota,37R6P@33090|Viridiplantae,3G8BW@35493|Streptophyta	35493|Streptophyta	E	Uncharacterized protein K02A2.6-like	-	-	-	-	-	-	-	-	-	-	-	-	RVT_1,RVT_3,Retrotrans_gag,rve
HiC_scaffold_9:206908711-206958711_9	38727.Pavir.J19810.1.p	2.21e-33	124.0	KOG4585@1|root,KOG4585@2759|Eukaryota,384XB@33090|Viridiplantae,3GSWI@35493|Streptophyta,3M3K1@4447|Liliopsida,3IM6P@38820|Poales	35493|Streptophyta	L	source UniProtKB	-	-	-	-	-	-	-	-	-	-	-	-	Myb_DNA-bind_3
HiC_scaffold_9:206908711-206958711_10	4572.TRIUR3_10236-P1	9.59e-18	81.3	KOG4585@1|root,KOG4585@2759|Eukaryota,37TH9@33090|Viridiplantae,3GBG0@35493|Streptophyta,3M2E2@4447|Liliopsida,3IE4B@38820|Poales	35493|Streptophyta	L	DDE superfamily endonuclease	-	-	-	-	-	-	-	-	-	-	-	-	DDE_Tnp_4
HiC_scaffold_9:206908711-206958711_11	71139.XP_010041715.1	5.58e-34	129.0	KOG4585@1|root,KOG4585@2759|Eukaryota	2759|Eukaryota	B	nuclease activity	-	-	-	-	-	-	-	-	-	-	-	-	DDE_Tnp_4,Myb_DNA-bind_3
HiC_scaffold_9:206908711-206958711_23	4113.PGSC0003DMT400089550	7.04e-10	62.4	28ZZA@1|root,2R6U4@2759|Eukaryota,387D9@33090|Viridiplantae,3GZ56@35493|Streptophyta,44UJX@71274|asterids	35493|Streptophyta	S	Conserved gene of	-	-	-	-	-	-	-	-	-	-	-	-	zf-GRF
HiC_scaffold_9:206908711-206958711_29	77586.LPERR08G12600.1	2.12e-32	115.0	COG5262@1|root,KOG1756@2759|Eukaryota,37TTZ@33090|Viridiplantae,3GIA8@35493|Streptophyta,3KZ3K@4447|Liliopsida,3IGTG@38820|Poales	35493|Streptophyta	B	Core component of nucleosome. Nucleosomes wrap and compact DNA into chromatin, limiting DNA accessibility to the cellular machineries which require DNA as a template. Histones thereby play a central role in transcription regulation, DNA repair, DNA replication and chromosomal stability. DNA accessibility is regulated via a complex set of post-translational modifications of histones, also called h…	-	GO:0000228,GO:0000785,GO:0000790,GO:0003674,GO:0003676,GO:0003677,GO:0005488,GO:0005575,GO:0005622,GO:0005623,GO:0005634,GO:0005694,GO:0006325,GO:0006342,GO:0006355,GO:0006996,GO:0008150,GO:0009889,GO:0009890,GO:0009892,GO:0009987,GO:0010468,GO:0010556,GO:0010558,GO:0010605,GO:0010629,GO:0016043,GO:0016458,GO:0019219,GO:0019222,GO:0031323,GO:0031324,GO:0031326,GO:0031327,GO:0031974,GO:0031981,GO:…	-	ko:K11251	ko04217,ko05034,ko05322,map04217,map05034,map05322	-	-	-	ko00000,ko00001,ko03036,ko04147	-	-	-	Histone,Histone_H2A_C
HiC_scaffold_9:206908711-206958711_53	2711.XP_006493522.1	1.94e-34	132.0	28W8B@1|root,2R30B@2759|Eukaryota,37X7C@33090|Viridiplantae,3GJR2@35493|Streptophyta	35493|Streptophyta	-	-	-	-	-	-	-	-	-	-	-	-	-	-	RVP_2,Retrotrans_gag
HiC_scaffold_9:206908711-206958711_54	161934.XP_010680400.1	6.8e-111	363.0	COG2801@1|root,KOG0017@2759|Eukaryota,37NRU@33090|Viridiplantae,3GGV0@35493|Streptophyta	35493|Streptophyta	E	L-threonine ammonia-lyase activity	-	GO:0000943,GO:0003674,GO:0003676,GO:0003723,GO:0003824,GO:0003887,GO:0003964,GO:0004518,GO:0004540,GO:0005488,GO:0005575,GO:0005622,GO:0005623,GO:0005634,GO:0006139,GO:0006259,GO:0006278,GO:0006508,GO:0006725,GO:0006807,GO:0008150,GO:0008152,GO:0008233,GO:0009058,GO:0009059,GO:0009987,GO:0016070,GO:0016740,GO:0016772,GO:0016779,GO:0016787,GO:0016788,GO:0018130,GO:0019438,GO:0019538,GO:0032196,GO:…	-	-	-	-	-	-	-	-	-	-	Chromo,RVP_2,RVT_1,Retrotrans_gag,rve
HiC_scaffold_9:206908711-206958711_56	50452.A0A087G2C7	3.63e-59	196.0	COG2801@1|root,KOG0017@2759|Eukaryota,37NRU@33090|Viridiplantae,3GGV0@35493|Streptophyta,3HXPF@3699|Brassicales	35493|Streptophyta	I	3-hydroxyisobutyryl-CoA hydrolase activity	-	GO:0000943,GO:0003674,GO:0003676,GO:0003723,GO:0003824,GO:0003887,GO:0003964,GO:0004518,GO:0004540,GO:0005488,GO:0005575,GO:0005622,GO:0005623,GO:0005634,GO:0006139,GO:0006259,GO:0006278,GO:0006508,GO:0006725,GO:0006807,GO:0008150,GO:0008152,GO:0008233,GO:0009058,GO:0009059,GO:0009987,GO:0016070,GO:0016740,GO:0016772,GO:0016779,GO:0016787,GO:0016788,GO:0018130,GO:0019438,GO:0019538,GO:0032196,GO:…	-	-	-	-	-	-	-	-	-	-	Chromo,RVP_2,RVT_1,Retrotrans_gag,rve
HiC_scaffold_9:206908711-206958711_57	981085.XP_010104920.1	1.9e-16	80.9	COG2801@1|root,KOG0017@2759|Eukaryota,37NRU@33090|Viridiplantae,3GGV0@35493|Streptophyta	35493|Streptophyta	E	L-threonine ammonia-lyase activity	-	GO:0000943,GO:0003674,GO:0003676,GO:0003723,GO:0003824,GO:0003887,GO:0003964,GO:0004518,GO:0004540,GO:0005488,GO:0005575,GO:0005622,GO:0005623,GO:0005634,GO:0006139,GO:0006259,GO:0006278,GO:0006508,GO:0006725,GO:0006807,GO:0008150,GO:0008152,GO:0008233,GO:0009058,GO:0009059,GO:0009987,GO:0016070,GO:0016740,GO:0016772,GO:0016779,GO:0016787,GO:0016788,GO:0018130,GO:0019438,GO:0019538,GO:0032196,GO:…	-	-	-	-	-	-	-	-	-	-	Chromo,RVP_2,RVT_1,Retrotrans_gag,rve
HiC_scaffold_9:206908711-206958711_58	981085.XP_010104920.1	1.05e-16	80.9	COG2801@1|root,KOG0017@2759|Eukaryota,37NRU@33090|Viridiplantae,3GGV0@35493|Streptophyta	35493|Streptophyta	E	L-threonine ammonia-lyase activity	-	GO:0000943,GO:0003674,GO:0003676,GO:0003723,GO:0003824,GO:0003887,GO:0003964,GO:0004518,GO:0004540,GO:0005488,GO:0005575,GO:0005622,GO:0005623,GO:0005634,GO:0006139,GO:0006259,GO:0006278,GO:0006508,GO:0006725,GO:0006807,GO:0008150,GO:0008152,GO:0008233,GO:0009058,GO:0009059,GO:0009987,GO:0016070,GO:0016740,GO:0016772,GO:0016779,GO:0016787,GO:0016788,GO:0018130,GO:0019438,GO:0019538,GO:0032196,GO:…	-	-	-	-	-	-	-	-	-	-	Chromo,RVP_2,RVT_1,Retrotrans_gag,rve
HiC_scaffold_9:206908711-206958711_59	981085.XP_010097264.1	1.8e-46	162.0	COG2801@1|root,KOG0017@2759|Eukaryota,37HSV@33090|Viridiplantae,3GA7E@35493|Streptophyta,4JK6U@91835|fabids	35493|Streptophyta	L	Biotin carboxyl carrier protein of acetyl-CoA carboxylase	-	GO:0000943,GO:0003674,GO:0003676,GO:0003723,GO:0003824,GO:0003887,GO:0003964,GO:0004518,GO:0004540,GO:0005488,GO:0005575,GO:0005622,GO:0005623,GO:0005634,GO:0006139,GO:0006259,GO:0006278,GO:0006508,GO:0006725,GO:0006807,GO:0008150,GO:0008152,GO:0008233,GO:0009058,GO:0009059,GO:0009987,GO:0016070,GO:0016740,GO:0016772,GO:0016779,GO:0016787,GO:0016788,GO:0018130,GO:0019438,GO:0019538,GO:0032196,GO:…	-	-	-	-	-	-	-	-	-	-	Biotin_lipoyl
HiC_scaffold_9:206908711-206958711_61	28532.XP_010544454.1	1.25e-43	150.0	COG2801@1|root,KOG0017@2759|Eukaryota,37NRU@33090|Viridiplantae,3GGV0@35493|Streptophyta,3HXPF@3699|Brassicales	35493|Streptophyta	I	3-hydroxyisobutyryl-CoA hydrolase activity	-	-	-	-	-	-	-	-	-	-	-	-	Chromo,RVP_2,RVT_1,Retrotrans_gag,rve
HiC_scaffold_9:206908711-206958711_63	4641.GSMUA_Achr9P04580_001	7.13e-30	112.0	KOG3320@1|root,KOG3320@2759|Eukaryota,37JH1@33090|Viridiplantae,3G7FK@35493|Streptophyta,3KRFM@4447|Liliopsida	35493|Streptophyta	J	Belongs to the eukaryotic ribosomal protein eS7 family	-	GO:0002181,GO:0005575,GO:0005622,GO:0005623,GO:0005737,GO:0005829,GO:0005840,GO:0006139,GO:0006364,GO:0006396,GO:0006412,GO:0006518,GO:0006725,GO:0006807,GO:0008150,GO:0008152,GO:0009058,GO:0009059,GO:0009987,GO:0010467,GO:0015935,GO:0016070,GO:0016072,GO:0019538,GO:0022613,GO:0022626,GO:0022627,GO:0030684,GO:0030686,GO:0032040,GO:0032991,GO:0034470,GO:0034641,GO:0034645,GO:0034660,GO:0042254,GO:…	-	ko:K02993	ko03010,map03010	M00177	-	-	br01610,ko00000,ko00001,ko00002,ko03011	-	-	-	Ribosomal_S7e
HiC_scaffold_9:8027404-8077404_10	38727.Pavir.J12536.1.p	2.04e-19	87.4	KOG4585@1|root,KOG4585@2759|Eukaryota,38AG8@33090|Viridiplantae,3H07D@35493|Streptophyta,3M48T@4447|Liliopsida,3IP7V@38820|Poales	35493|Streptophyta	L	nuclease activity	-	-	-	-	-	-	-	-	-	-	-	-	-
HiC_scaffold_9:8027404-8077404_16	3712.Bo8g032240.1	4.73e-22	89.4	2CM7X@1|root,2QPJS@2759|Eukaryota,37S11@33090|Viridiplantae,3GDMG@35493|Streptophyta,3HQ9M@3699|Brassicales	35493|Streptophyta	T	exchange factor	-	GO:0000003,GO:0000902,GO:0000904,GO:0001558,GO:0003006,GO:0003674,GO:0005085,GO:0005088,GO:0005089,GO:0005488,GO:0005515,GO:0005575,GO:0005623,GO:0005886,GO:0008150,GO:0009653,GO:0009826,GO:0009856,GO:0009860,GO:0009932,GO:0009987,GO:0010769,GO:0010817,GO:0016020,GO:0016043,GO:0016049,GO:0016324,GO:0017016,GO:0017048,GO:0019899,GO:0022414,GO:0022603,GO:0022604,GO:0030154,GO:0031267,GO:0032092,GO:…	-	-	-	-	-	-	-	-	-	-	PRONE
HiC_scaffold_9:8027404-8077404_17	4641.GSMUA_Achr11P06450_001	2.9e-36	132.0	2CM7X@1|root,2QPJS@2759|Eukaryota,37S11@33090|Viridiplantae,3GDMG@35493|Streptophyta,3KSNF@4447|Liliopsida	35493|Streptophyta	G	Rop guanine nucleotide exchange factor	-	GO:0000003,GO:0000902,GO:0000904,GO:0001558,GO:0003006,GO:0003674,GO:0005085,GO:0005088,GO:0005089,GO:0005488,GO:0005515,GO:0005575,GO:0005623,GO:0005886,GO:0008150,GO:0009653,GO:0009826,GO:0009856,GO:0009860,GO:0009932,GO:0009987,GO:0010769,GO:0010817,GO:0016020,GO:0016043,GO:0016049,GO:0016324,GO:0017016,GO:0017048,GO:0019899,GO:0022414,GO:0022603,GO:0022604,GO:0030154,GO:0031267,GO:0032092,GO:…	-	-	-	-	-	-	-	-	-	-	PRONE
HiC_scaffold_9:8027404-8077404_18	42345.XP_008797976.1	1.88e-44	159.0	2CM7X@1|root,2QPJS@2759|Eukaryota,37S11@33090|Viridiplantae,3GDMG@35493|Streptophyta,3KSNF@4447|Liliopsida	35493|Streptophyta	G	Rop guanine nucleotide exchange factor	-	GO:0000003,GO:0000902,GO:0000904,GO:0001558,GO:0003006,GO:0003674,GO:0005085,GO:0005088,GO:0005089,GO:0005488,GO:0005515,GO:0005575,GO:0005623,GO:0005886,GO:0008150,GO:0009653,GO:0009826,GO:0009856,GO:0009860,GO:0009932,GO:0009987,GO:0010769,GO:0010817,GO:0016020,GO:0016043,GO:0016049,GO:0016324,GO:0017016,GO:0017048,GO:0019899,GO:0022414,GO:0022603,GO:0022604,GO:0030154,GO:0031267,GO:0032092,GO:…	-	-	-	-	-	-	-	-	-	-	PRONE
HiC_scaffold_9:8027404-8077404_19	4641.GSMUA_Achr11P06440_001	1.69e-42	144.0	2CM7X@1|root,2QPJS@2759|Eukaryota,37S11@33090|Viridiplantae,3GDMG@35493|Streptophyta,3KSNF@4447|Liliopsida	35493|Streptophyta	G	Rop guanine nucleotide exchange factor	-	GO:0000003,GO:0000902,GO:0000904,GO:0001558,GO:0003006,GO:0003674,GO:0005085,GO:0005088,GO:0005089,GO:0005488,GO:0005515,GO:0005575,GO:0005623,GO:0005886,GO:0008150,GO:0009653,GO:0009826,GO:0009856,GO:0009860,GO:0009932,GO:0009987,GO:0010769,GO:0010817,GO:0016020,GO:0016043,GO:0016049,GO:0016324,GO:0017016,GO:0017048,GO:0019899,GO:0022414,GO:0022603,GO:0022604,GO:0030154,GO:0031267,GO:0032092,GO:…	-	-	-	-	-	-	-	-	-	-	PRONE
HiC_scaffold_9:8027404-8077404_63	161934.XP_010681207.1	1.39e-44	154.0	28PZB@1|root,2QWN0@2759|Eukaryota,37VME@33090|Viridiplantae,3GJZ7@35493|Streptophyta	35493|Streptophyta	-	-	-	-	-	-	-	-	-	-	-	-	-	-	Retrotran_gag_2,zf-CCHC
HiC_scaffold_9:8027404-8077404_66	57918.XP_004308697.1	5.88e-16	77.4	COG2801@1|root,KOG1654@1|root,KOG0017@2759|Eukaryota,KOG1654@2759|Eukaryota,37UHR@33090|Viridiplantae,3GIM6@35493|Streptophyta,4JPI7@91835|fabids	35493|Streptophyta	Z	Belongs to the ATG8 family	-	-	-	ko:K08341	ko04068,ko04136,ko04137,ko04138,ko04139,ko04140,ko04212,ko04371,ko04621,ko04727,ko05167,map04068,map04136,map04137,map04138,map04139,map04140,map04212,map04371,map04621,map04727,map05167	-	-	-	ko00000,ko00001,ko03029,ko04121,ko04131	-	-	-	Atg8
HiC_scaffold_9:8027404-8077404_68	4538.ORGLA04G0279600.1	9.98e-14	70.5	COG2801@1|root,KOG0017@2759|Eukaryota,37THH@33090|Viridiplantae,3GG2K@35493|Streptophyta,3M2IR@4447|Liliopsida	35493|Streptophyta	L	Reverse transcriptase (RNA-dependent DNA polymerase)	-	-	-	-	-	-	-	-	-	-	-	-	RVT_2,rve
HiC_scaffold_9:8027404-8077404_69	4096.XP_009768097.1	4.31e-18	83.6	COG2801@1|root,KOG0017@2759|Eukaryota,383NN@33090|Viridiplantae,3GNHS@35493|Streptophyta	4096.XP_009768097.1|-	L	transposition, RNA-mediated	-	-	-	-	-	-	-	-	-	-	-	-	-
HiC_scaffold_9:8027404-8077404_70	13333.ERM98543	7.98e-127	370.0	COG2801@1|root,KOG0017@2759|Eukaryota,383NN@33090|Viridiplantae,3GNHS@35493|Streptophyta	35493|Streptophyta	L	transposition, RNA-mediated	-	-	-	-	-	-	-	-	-	-	-	-	-
HiC_scaffold_9:8027404-8077404_87	3641.EOX94090	7.14e-64	204.0	COG2801@1|root,KOG0017@2759|Eukaryota,37RRH@33090|Viridiplantae	33090|Viridiplantae	I	DNA RNA polymerases superfamily protein	-	-	-	-	-	-	-	-	-	-	-	-	Asp_protease_2,RVP_2,RVT_1,Retrotrans_gag
In total, 144 queries were scaned. Utilising the reference genome, sequences were generated encompassing a total of 50 kilobases, including 25 kilobases upstream and downstream of each significant SNP.
